# Supplementary material
Source: publisher figshare collection journal article supplement (https://rs.figshare.com/ndownloader/files/29273776)
Supplement: Supplementary file 1 [file 29273776]

## Sheet: Bioinformatic statistics
			Sequence quality filtering				Mapping				Map filter
Sample	Replicate	Day	raw	qual filter	adaptor match	clean fastq	all	QV >=10	avg hits/ matched read	% mapping	raw mappings	>=1 match	weak match	ambiguous	Unique remaining
Eggs	-	0	4937567	4785456	44954	4740502	2998430	1281478	2.06	0.632513	6184861	2471277	891012	1504860	966417
WA1-D2	1	2	12125947	11990480	40011	11950469	7952953	3221936	2.11	0.665493	16763388	6571723	2353809	4162912	2408811
WA2-D2	2	2	2229377	2199219	40660	2158559	1295826	533812	2.1	0.60032	2714863	1070686	384702	669381	401305
WA3-D2	3	2	4396436	4350110	17557	4332553	2536505	1066913	2.08	0.585453	5265479	2089392	753353	1289728	799664
WA4-D2	4	2	2357303	2331181	8366	2322815	1421060	581084	2.1	0.611784	2989325	1185307	401070	744084	441223
WA5-D2	5	2	3912891	3858573	84178	3774395	1323729	532327	2.13	0.350713	2817945	1113036	344743	713152	399884
WA1-D6	1	6	1823375	1788486	906662	881824	85172	38127	2.02	0.0965862	172167	62742	34549	39820	22922
WA3-D6	3	6	3447370	3407422	19442	3387980	2048810	873660	2.06	0.604729	4225927	1699913	601063	1029467	670446
WA4-D6	4	6	3772550	3723276	363464	3359812	2042372	842698	2.1	0.607883	4284541	1693208	587233	1061970	631238
WA5-D6	5	6	2234758	2213736	17509	2196227	1441303	608330	2.07	0.656263	2987852	1162847	473333	718941	443906
WA1-D10	1	10	7255330	7165647	135907	7029740	4508597	1842833	2.11	0.64136	9494392	3705385	1367190	2339768	1365617
WA2-D10	2	10	7316634	7223443	222322	7001121	4618729	1883362	2.1	0.659713	9715737	3810225	1383492	2400952	1409273
WA3-D10	3	10	5763903	5688085	278247	5409838	3778068	1272128	2.27	0.69837	8591429	3287480	820248	2320112	967368
WA4-D10	4	10	5137535	5072979	56016	5016963	3244697	1333484	2.1	0.646745	6828767	2707153	895813	1703835	1003318
WA5-D10	5	10	4549583	4489945	35630	4454315	2997133	1221735	2.1	0.672861	6303868	2471640	907862	1554079	917561
WA1-D16	1	16	5749373	5693897	12171	5681726	3715734	1579167	2.06	0.65398	7668605	3062536	1113438	1866743	1195793
WA2-D16	2	16	6314380	6249434	40618	6208816	3723647	1319456	2.23	0.599735	8300404	3238202	820023	2212431	1025771
WA3-D16	3	16	1486092	1469320	28940	1440380	795590	235284	2.36	0.552347	1876334	709515	148249	525144	184371
WA5-D16	5	16	8082566	8008906	25832	7983074	5345891	2314287	2.05	0.669653	10955481	4328066	1712577	2624593	1703473
WA1-D22	1	22	8761300	8666230	90015	8576215	5074431	2144308	2.07	0.591687	10494511	4250854	1397947	2595811	1655043
WA2-D22	2	22	4693999	4640630	52350	4588280	2763362	1233426	2.02	0.602265	5576166	2288543	804410	1337684	950859
WA3-D22	3	22	8970549	8886456	50614	8835842	5614330	2465819	2.04	0.635404	11427594	4646368	1628906	2761730	1884638
WA4-D22	4	22	5238631	5178774	81608	5097166	2864427	1254374	2.04	0.561965	5834923	2384219	813295	1416429	967790
WA5-D22	5	22	5369862	5314699	92454	5222245	3278707	1438718	2.03	0.627835	6670811	2715737	948032	1614616	1101121

## Sheet: AF_data
	p-values from linear model		Mean allele frequencies at each age						Categories of change		Genomic position		Linkage group mapping		Linkage groups from Hedgecock et al., 2015
SNP #	raw P	Adjusted P	AF_D0	AF_D2	AF_D6	AF_D10	AF_D16	AF_D22	Parametric category	Cluster number	BWA scaffold	position	LG	cM
1	7.82962e-10	6.69867e-09	0.601942	0.562406	0.519001	0.447895	0.43568	0.454254	BD	2	100	74259	NA	NA
2	0.0801121	0.115204	0.0240964	0.0263252	0.0137279	0.01504	0.0245368	0.0142693	NS	NA	1004	231720	6	48.67
3	0.219885	0.269137	0.02	0.0214083	0.0112963	0.0121296	0.0330565	0.0250366	NS	NA	1004	350782	6	48.67
4	0.0004935	0.00134837	0.0543478	0.10568	0.081291	0.167165	0.181613	0.0784217	UD	3	1009	934228	NA	NA
5	0.000209747	0.000625549	0.0251799	0.0282645	0.0187933	0.0156211	0.0145025	0.0373943	UD	2	1009	980354	NA	NA
6	2.87079e-05	0.000104809	0.0547945	0.0357584	0.0242249	0.0361343	0.0260844	0.0680279	UD	2	1014	405120	NA	NA
7	0.0371402	0.0594665	0.0153846	0.00422782	0.003663	0.00912036	0.0146547	0.0148755	NS	NA	1014	413619	NA	NA
8	7.34579e-10	6.41432e-09	0.167785	0.0796517	0.0240964	0.149037	0.248214	0.104632	BD	5	1017	408149	NA	NA
9	0.102983	0.143701	0.0434783	0.00820495	0	0.0107429	0.0284105	0.0121172	NS	NA	1018	544145	4	35.92
10	1.18962e-07	6.949e-07	0.0451977	0.0463897	0.124006	0.17083	0.100809	0.0756628	UD	2	102	1088975	NA	NA
11	4.20616e-29	1.87506e-27	0.220779	0.349882	0.342486	0.513641	0.51091	0.322195	BD	3	102	1153212	NA	NA
12	6.58752e-07	3.26294e-06	0.148936	0.120522	0.162698	0.11902	0.0598361	0.170745	UD	2	102	1207414	NA	NA
13	1.5054e-11	1.72307e-10	0.0675676	0.0569742	0.136774	0.113375	0.0829547	0.217613	UD	2	102	1694194	NA	NA
14	0.0013005	0.00323977	0.0449438	0.150638	0.0869318	0.156115	0.0674375	0.0813708	G	3	1021	292985	1	26.55
15	0.0514924	0.0788682	0.25	0.157358	0.164413	0.131035	0.195076	0.179498	NS	NA	1024	1434027	NA	NA
16	1.45562e-10	1.46775e-09	0.0201342	0.0494921	0.0505457	0.0597064	0.0431508	0.0120156	BD	1	1024	1585617	NA	NA
17	0.0473023	0.073649	0.031746	0.0417445	0.0177458	0.045374	0.0740554	0.0333631	NS	NA	1024	928119	NA	NA
18	0.000180113	0.000550743	0.100529	0.110208	0.0961788	0.0624374	0.107897	0.12497	UD	1	1024	966100	NA	NA
19	0.1697	0.21911	0.0714286	0.0771923	0.0996825	0.104355	0.069811	0.0695332	NS	NA	1028	103930	8	9.61
20	0.00253479	0.00586602	0.0617284	0.0629035	0.059684	0.0385828	0.0513468	0.030613	G	1	1033	108483	NA	NA
21	0.195529	0.246082	0.0194175	0.0209618	0.0113636	0.0249453	0.0233304	0.0145402	NS	NA	1035	151583	NA	NA
22	0.442317	0.484661	0.0133333	0.0484951	0.0236928	0.0512881	0.0303644	0.0385263	NS	NA	1037	110364	1	47.45
23	4.99213e-05	0.000171883	0.0566038	0.0500742	0.0506654	0.0564997	0.0222348	0.090493	UD	2	1037	259242	1	47.45
24	0.0841025	0.120329	0.0334728	0.0234261	0.0362437	0.0361364	0.0273576	0.0150089	NS	NA	105	138270	NA	NA
25	1.65802e-05	6.41253e-05	0.0226537	0.0236617	0.0170332	0.0368806	0.03019	0.060405	UD	2	105	306326	NA	NA
26	0.00720669	0.0143625	0.0958904	0.0587011	0.0476165	0.0573652	0.0471277	0.0798749	UD	2	107	369253	4	9.1
27	0.00656619	0.0131791	0.0746269	0.0573832	0.0570158	0.0683599	0.0361476	0.0440646	G	2	107	978140	4	9.1
28	1.11543e-06	5.36799e-06	0.0879121	0.0364287	0.0383486	0.0153913	0.0646352	0.043793	UD	1	1077	508347	NA	NA
29	0.155373	0.203401	0.288732	0.18683	0.195	0.223501	0.247433	0.255288	NS	NA	1083	266013	3	19.4
30	2.05523e-10	2.02416e-09	0.133739	0.100067	0.0635442	0.116546	0.246475	0.157548	BD	5	109	299548	NA	NA
31	0.000559892	0.00151511	0.0509259	0.0177028	0.0185667	0.0356674	0.0684409	0.0345963	G	1	109	451521	NA	NA
32	0.000268401	0.000781221	0.101562	0.0571734	0.0557127	0.0346157	0.041404	0.078933	G	2	109	479606	NA	NA
33	0.000633748	0.00170408	0.146341	0.072617	0.111134	0.107846	0.091889	0.169804	UD	2	1093	517389	6	43.92
34	6.8486e-08	4.39452e-07	0.0606061	0.0947095	0.0742938	0.146358	0.122657	0.0696765	UD	3	1094	151502	10	40.1
35	0.000118048	0.000378736	0.107843	0.0730238	0.0563725	0.064755	0.0444415	0.115357	G	2	1094	334105	10	40.1
36	0.00118098	0.00300388	0.313869	0.41913	0.33805	0.458276	0.446719	0.388141	G	3	1097	342884	NA	NA
37	0.482224	0.519648	0.0991736	0.10426	0.134415	0.105248	0.0773766	0.0982664	NS	NA	1101	59335	5	46.83
38	8.0664e-05	0.000266884	0.0204082	0.0411842	0.0307421	0.0308894	0.0856725	0.0191909	BD	1	1101	649676	5	46.83
39	6.90665e-10	6.09368e-09	0.442211	0.229491	0.299213	0.255471	0.25275	0.382665	UD	2	1116	180352	1	1.35
40	0.0488956	0.075574	0.05	0.0388477	0.0400832	0.0566351	0.066236	0.0540047	NS	NA	1119	128974	NA	NA
41	0.0374831	0.059677	0.0442177	0.0264663	0.0571718	0.0241993	0.0240856	0.024609	NS	NA	1119	201237	NA	NA
42	0.178866	0.228162	0.017094	0.0122558	0.0247525	0.0252065	0.00384615	0.0133465	NS	NA	1121	124420	NA	NA
43	6.87746e-11	7.10392e-10	0.0425532	0.0998113	0.0754196	0.1135	0.113532	0.0450386	UD	3	1124	6209	NA	NA
44	0.157296	0.205602	0.0410959	0.035826	0.0490164	0.0443653	0.041141	0.0250694	NS	NA	1128	802	NA	NA
45	2.71281e-07	1.52507e-06	0.140351	0.112356	0.105172	0.0768554	0.0739988	0.0335173	UD	1	1138	259252	NA	NA
46	0.14643	0.195316	0.0413534	0.0540555	0.0652334	0.0470775	0.038876	0.0654306	NS	NA	114	7034	NA	NA
47	0.742592	0.76798	0.0372093	0.0409932	0.0332059	0.0437997	0.0399613	0.0435399	NS	NA	1141	11957	NA	NA
48	0.00885832	0.017288	0.531915	0.511161	0.447064	0.425407	0.442745	0.525477	G	2	1143	27730	NA	NA
49	0.0215351	0.0365748	0.414815	0.380477	0.383131	0.410393	0.398087	0.345036	G	1	1149	13666	3	10.75
50	2.29023e-08	1.59002e-07	0.048	0.0515631	0.076565	0.0556745	0.0859604	0.107545	UD	2	1149	565429	3	10.75
51	0.0925134	0.131475	0.0208333	0.0272124	0.01875	0.0184645	0.0465075	0.0445895	NS	NA	115	180510	9	54.49
52	0.358451	0.405351	0.0377358	0.0286091	0.0453933	0.0570649	0.0427145	0.0483464	NS	NA	115	607516	9	54.49
53	0.0035798	0.00787556	0.0724638	0.0370779	0.0494797	0.0342349	0.0370512	0.0251295	G	1	1154	211896	NA	NA
54	0.00050214	0.00136756	0.0227273	0.0356674	0.0168238	0.0309494	0.0146478	0.0199588	G	2	1154	310105	NA	NA
55	0.0543375	0.0820911	0.0786517	0.1364	0.106473	0.155896	0.140312	0.0978683	NS	NA	1155	70269	NA	NA
56	0.0263862	0.0436506	0.0153846	0.0189652	0	0.00889239	0.0169455	0.00697242	G	1	1160	335987	NA	NA
57	0.458686	0.498725	0.0180723	0.0291532	0.0154643	0.0195686	0.0189799	0.014318	NS	NA	1160	408521	NA	NA
58	0.00170204	0.00406093	0.0172414	0.00879329	0	0.0216297	0.0387437	0.030255	G	1	1164	255010	NA	NA
59	5.28557e-05	0.00018125	0.0960452	0.135929	0.106832	0.159817	0.179835	0.110275	UD	3	1174	1040339	NA	NA
60	0.276415	0.325011	0.0740741	0.0561636	0.0611161	0.0614799	0.036756	0.065169	NS	NA	1174	1090163	NA	NA
61	8.94023e-06	3.71195e-05	0.0239521	0.0155842	0.0151515	0.024339	0.00194175	0.0366089	UD	2	1174	414565	NA	NA
62	0.328263	0.37777	0.0379747	0.054857	0.0728929	0.0588095	0.0470413	0.0662424	NS	NA	1174	577543	NA	NA
63	0.00019179	0.000580166	0.205674	0.152441	0.201418	0.19771	0.281638	0.250565	G	1	1174	913184	NA	NA
64	0.000218042	0.000645739	0.12	0.0469878	0.0738767	0.0502762	0.0566977	0.0970785	UD	2	1179	1034032	NA	NA
65	9.59285e-12	1.12849e-10	0.389706	0.211046	0.218908	0.198629	0.261115	0.249751	BD	1	1179	1233863	NA	NA
66	0.00371267	0.00812566	0.0185874	0.0130485	0.0184207	0.0241813	0.00954631	0.0361961	UD	2	1179	1317420	NA	NA
67	0.00091619	0.00236589	0.0604651	0.0484604	0.134625	0.0795727	0.0235883	0.0667807	BD	2	1179	863753	NA	NA
68	0.46469	0.502031	0.0357143	0.0340634	0.0393529	0.0281629	0.0246795	0.039169	NS	NA	1179	901323	NA	NA
69	0.0021086	0.00493366	0.113636	0.0197402	0.030303	0.0363421	0.0345084	0.081598	UD	2	1187	25830	NA	NA
70	0.00783231	0.0154999	0.0113636	0.0474997	0.0243854	0.05854	0.0214001	0.0549364	G	2	1189	130236	NA	NA
71	0.12951	0.175512	0.0183486	0.0430388	0.00684932	0.0416463	0.0365458	0.0350282	NS	NA	1198	55384	NA	NA
72	0.0269481	0.0444933	0.0553191	0.0255348	0.00913242	0.0246575	0.0297815	0.0359197	G	1	120	420904	NA	NA
73	0.0147808	0.0265144	0.12963	0.105584	0.174097	0.101375	0.196276	0.106026	UD	1	1204	128309	NA	NA
74	0.00221599	0.00517064	0.0501567	0.0705022	0.0329992	0.0341461	0.0347859	0.0489869	UD	1	1209	88287	3	85.99
75	0.367275	0.413123	0.0124481	0.00690942	0.0160455	0.0100052	0.00700701	0.0120274	NS	NA	1213	504871	NA	NA
76	0.0105534	0.019776	0.0160256	0.00754009	0.0594406	0.0145534	0.00893853	0.0192717	UD	2	1213	812252	NA	NA
77	0.00151942	0.003677	0.03861	0.0426105	0.0543203	0.056048	0.0473296	0.0635019	G	2	122	152378	6	100.52
78	9.78441e-27	3.60322e-25	0.21134	0.426628	0.373452	0.594753	0.515059	0.442974	BD	3	1221	159822	NA	NA
79	0.44006	0.48337	0.0666667	0.10722	0.0930081	0.093694	0.0968719	0.110197	NS	NA	1222	373510	6	16.89
80	0.116496	0.159923	0.0734266	0.0903191	0.109444	0.0902346	0.0743352	0.0748857	NS	NA	1228	147756	NA	NA
81	0.0057258	0.0118576	0.025974	0.0367915	0.0280113	0.0191101	0.0130656	0.0364988	UD	2	1228	421860	NA	NA
82	0.0993102	0.139495	0.0212766	0.0235273	0	0.0128944	0.0227522	0.0189964	NS	NA	1228	4964	NA	NA
83	0.20057	0.250195	0.0201005	0.010839	0.018955	0.0136267	0.00828944	0.0080064	NS	NA	123	121619	NA	NA
84	0.499459	0.536174	0.0364583	0.0151091	0.0324577	0.0239267	0.0333561	0.0196228	NS	NA	1237	86510	NA	NA
85	0.0476211	0.0740093	0.330579	0.334106	0.350182	0.374765	0.377494	0.323226	NS	NA	1241	273883	4	8.77
86	5.06656e-18	1.04668e-16	0.0566038	0.0496883	0.0478796	0.0759789	0.0661696	0.0269459	UD	1	1244	124639	NA	NA
87	0.0208355	0.0356518	0.015873	0.0131707	0.0368852	0.0129059	0.00319744	0.0308293	UD	2	1244	127269	NA	NA
88	0.209956	0.258477	0.0388889	0.0494959	0.0751742	0.0526162	0.0639548	0.041763	NS	NA	1244	327085	NA	NA
89	6.98712e-08	4.44969e-07	0.392857	0.469226	0.341028	0.289243	0.493478	0.322181	BD	5	1244	398155	NA	NA
90	6.33129e-05	0.000215366	0.111111	0.192066	0.215368	0.268603	0.270732	0.194245	G	3	1245	222441	NA	NA
91	1.42543e-14	2.15597e-13	0.331288	0.419558	0.498925	0.574702	0.279425	0.432164	BD	4	1252	282455	NA	NA
92	0.00341768	0.00763793	0.159091	0.068042	0.0513691	0.0572143	0.130108	0.0789338	G	1	1255	265585	NA	NA
93	0.000409519	0.00114476	0.117647	0.184785	0.223373	0.212819	0.217729	0.17515	G	1	1258	308537	9	31.32
94	3.6654e-07	1.96493e-06	0.0504202	0.021906	0.0331007	0.0370625	0.0820669	0.026533	BD	1	1262	286604	NA	NA
95	6.96598e-06	2.99502e-05	0.0155642	0.0443824	0.0556816	0.0703631	0.133301	0.0328388	UD	1	1262	403038	NA	NA
96	0.015154	0.0270789	0.0873786	0.152914	0.11241	0.134095	0.1133	0.182163	G	2	1262	568579	NA	NA
97	0.646551	0.676085	0.0188679	0.0214737	0.0257353	0.0342593	0.0304324	0.0281665	NS	NA	1267	1024277	NA	NA
98	0.000131203	0.000416214	0.0808081	0.121534	0.180729	0.128354	0.131464	0.177868	G	2	1267	209916	NA	NA
99	0.0357366	0.0575454	0.0280899	0.0396619	0.0379572	0.0595885	0.0165943	0.0557676	NS	NA	127	89114	NA	NA
100	1.92808e-05	7.35625e-05	0.1875	0.218011	0.150934	0.149566	0.193751	0.126779	UD	1	1272	124527	NA	NA
101	0.141436	0.189551	0.0241546	0.0353269	0.037137	0.0531777	0.0460791	0.0491104	NS	NA	1288	151598	NA	NA
102	0.161835	0.210884	0.0526316	0.0379453	0.049843	0.054403	0.0227995	0.0278109	NS	NA	1288	212169	NA	NA
103	1.30973e-05	5.20816e-05	0.021978	0.0269122	0.0295312	0.0259568	0.0142008	0.0543347	UD	2	1293	359856	NA	NA
104	0.00164511	0.00394734	0.369748	0.413102	0.262755	0.417941	0.435417	0.429045	UD	3	13	201937	NA	NA
105	0.0135451	0.0246194	0.0265487	0.0279207	0.0328861	0.0170701	0.0131622	0.00644432	G	1	1301	56949	7	66.53
106	0.0135451	0.0246194	0.0265487	0.0279207	0.0328861	0.0170701	0.0131622	0.00644432	G	1	1301	56963	7	66.53
107	0.0132131	0.0241195	0.0491803	0.0309894	0.039114	0.0397443	0.0144481	0.0356958	UD	2	1301	958419	7	66.53
108	0.162933	0.211988	0.02	0.0241655	0.00295858	0.0218608	0.0117302	0.0237626	NS	NA	1307	679063	NA	NA
109	0.179549	0.228345	0.037415	0.0410871	0.0280289	0.0281526	0.0323457	0.0175972	NS	NA	1315	271930	NA	NA
110	0.000139835	0.000440309	0.0732984	0.0796749	0.0417152	0.0188795	0.0378181	0.0376396	G	1	1315	520662	NA	NA
111	2.26169e-09	1.80722e-08	0.0604651	0.0844947	0.0592982	0.0466275	0.0254787	0.119022	UD	2	1315	521304	NA	NA
112	1.21686e-26	4.29452e-25	0.131148	0.0999917	0.160055	0.19752	0.0636772	0.242223	BD	4	1315	95582	NA	NA
113	0.270497	0.319541	0.0123457	0.00904515	0.0109489	0.0232562	0.0263643	0.0231283	NS	NA	1316	360519	NA	NA
114	0.0194447	0.0337493	0.304762	0.266333	0.310504	0.242275	0.275459	0.267541	G	1	1318	16532	NA	NA
115	3.54687e-15	5.7773e-14	0.275168	0.27673	0.274576	0.298516	0.287679	0.426007	UD	2	1321	256036	NA	NA
116	0.11465	0.158158	0.15534	0.128524	0.189697	0.140915	0.189867	0.143713	NS	NA	1324	282668	10	53.91
117	0.000488042	0.00133777	0.112903	0.146322	0.0977719	0.10611	0.130142	0.0734757	UD	1	1327	1191	NA	NA
118	4.6947e-05	0.000162303	0.0606061	0.0847251	0.0655934	0.0796784	0.113976	0.051689	UD	1	1327	290884	NA	NA
119	0.00372532	0.00813234	0.045045	0.0429597	0.00909091	0.0750674	0.0404483	0.0198579	G	3	1328	220255	NA	NA
120	1.75477e-06	8.17951e-06	0.0754717	0.0523885	0.0902821	0.125837	0.101448	0.0319026	UD	1	1328	86781	NA	NA
121	6.01848e-07	3.03432e-06	0.25	0.183167	0.0919355	0.118733	0.176	0.150094	BD	1	1329	230233	NA	NA
122	0.846865	0.862133	0.113636	0.132448	0.0989805	0.11373	0.105356	0.112231	NS	NA	133	100623	NA	NA
123	0.911667	0.917081	0.0114943	0.0255145	0.0134394	0.0211764	0.015	0.0188286	NS	NA	133	145156	NA	NA
124	0.0218765	0.0370588	0.0517241	0.0337118	0.0181818	0.0596354	0.0431732	0.0103365	G	1	1350	206772	5	65.52
125	0.371874	0.417223	0.0338164	0.0283927	0.0390201	0.0320813	0.0228162	0.0351092	NS	NA	1355	84026	NA	NA
126	0.326085	0.376287	0.025974	0.032816	0.0296375	0.0432403	0.0424173	0.0294358	NS	NA	1357	3041	NA	NA
127	0.430119	0.474981	0.0326087	0.0150367	0.0306588	0.0236369	0.0124331	0.0279402	NS	NA	1360	209942	NA	NA
128	0.0166825	0.0295608	0.0200803	0.0141392	0.0181301	0.00867353	0.0216683	0.0093856	UD	1	1362	322416	7	67.76
129	3.20834e-20	8.23474e-19	0.157576	0.128015	0.0282602	0.0851969	0.201033	0.0604924	BD	5	1362	789886	7	67.76
130	0.701965	0.728632	0.0271186	0.052611	0.0277746	0.0378801	0.0435579	0.0409671	NS	NA	1371	127678	NA	NA
131	0.000283247	0.000818805	0.0394737	0.0493077	0.0867388	0.0591299	0.0179261	0.0578591	BD	2	1378	20736	NA	NA
132	0.00605123	0.0124101	0.0117647	0.0257739	0.0289916	0.00619257	0.0228454	0.0100908	UD	1	1383	21854	NA	NA
133	1.30092e-07	7.54712e-07	0.265306	0.25986	0.27254	0.207579	0.267973	0.337836	G	2	1399	22223	NA	NA
134	3.76156e-09	2.92298e-08	0.133333	0.103812	0.11959	0.118151	0.108952	0.0563101	UD	1	140	181540	9	31.32
135	3.23361e-08	2.19109e-07	0.299492	0.339772	0.342163	0.237036	0.297659	0.264945	BD	1	1403	294504	8	49.38
136	0.00158986	0.0038365	0.011976	0.020192	0.0125598	0.0262839	0.00334361	0.0182369	UD	2	1404	160604	NA	NA
137	8.26553e-06	3.48304e-05	0.446809	0.341715	0.332651	0.320283	0.379049	0.465483	G	2	1404	175852	NA	NA
138	9.65738e-08	5.81943e-07	0.366667	0.40063	0.37264	0.305409	0.392572	0.291868	BD	1	1404	9837	NA	NA
139	9.63279e-37	1.16557e-34	0.111111	0.0884779	0.165025	0.0643476	0.182701	0.051685	BD	5	1409	182569	NA	NA
140	8.61764e-06	3.59564e-05	0.489796	0.229932	0.256375	0.280528	0.230838	0.285725	UD	2	1409	300643	NA	NA
141	0.00426596	0.00924109	0.157534	0.085769	0.0890545	0.111027	0.147089	0.139555	G	1	1419	21646	5	42.83
142	0.18256	0.231827	0.0416667	0.0376502	0.0297619	0.0714756	0.0633537	0.0221541	NS	NA	142	1231609	NA	NA
143	0.0642533	0.0954782	0.0943396	0.0642383	0.0751238	0.10811	0.0843014	0.131126	NS	NA	142	389904	NA	NA
144	0.303489	0.353333	0.0571429	0.0137767	0.0200148	0.031175	0.0234321	0.0249079	NS	NA	1423	1038455	NA	NA
145	1.56488e-29	7.36365e-28	0.311881	0.265372	0.193505	0.163365	0.232476	0.268332	BD	1	143	169341	NA	NA
146	0.0777397	0.112173	0.0341463	0.0377123	0.00558659	0.0256247	0.0177423	0.0254748	NS	NA	1431	80377	NA	NA
147	0.932461	0.936885	0.012987	0.00526301	0.0164923	0.0107002	0.00919058	0.013207	NS	NA	1439	27048	NA	NA
148	0.281784	0.329656	0.0444444	0.0263374	0.0201342	0.00827984	0.0243902	0.0228806	NS	NA	144	670361	6	101.19
149	8.22765e-16	1.45184e-14	0.728814	0.49057	0.330048	0.402768	0.705794	0.493195	BD	5	1445	27491	10	91.05
150	0.119529	0.16303	0.0659341	0.0461742	0.104345	0.076311	0.0602327	0.0875632	NS	NA	1448	209907	NA	NA
151	0.185287	0.234937	0.109453	0.138629	0.146544	0.131987	0.151704	0.118399	NS	NA	146	173692	6	59.71
152	0.00147742	0.00361669	0.049217	0.0205004	0.0149586	0.0317209	0.0432843	0.0408047	BD	1	146	657807	6	59.71
153	3.10285e-19	7.10301e-18	0.55303	0.407138	0.443218	0.424715	0.685094	0.375721	BD	5	1476	72219	3	16.21
154	0.457059	0.497595	0.0266667	0.0320197	0.0371295	0.0417327	0.0308621	0.049827	NS	NA	1477	20383	NA	NA
155	0.0205363	0.0352825	0.0272109	0.0285738	0.062354	0.0694053	0.0344246	0.0347258	G	2	1480	133351	NA	NA
156	6.09183e-07	3.05312e-06	0.202899	0.170022	0.213345	0.188696	0.180239	0.0981094	UD	1	1480	82159	NA	NA
157	0.00897499	0.0173955	0.120833	0.116056	0.161818	0.144787	0.142574	0.129993	UD	1	149	172830	NA	NA
158	0.0746984	0.108711	0.21519	0.17289	0.189947	0.227518	0.177838	0.224964	NS	NA	149	509578	NA	NA
159	0.0103319	0.0194116	0.0555556	0.0317688	0.0274723	0.0337949	0.0236208	0.0671384	UD	2	150	1192057	NA	NA
160	0.00635153	0.0129011	0.230769	0.208852	0.1758	0.206502	0.177369	0.149442	G	1	150	1336453	NA	NA
161	0.000733139	0.00194053	0.0480769	0.0401091	0.0255109	0.0599075	0.0834903	0.0524303	G	1	150	18731	NA	NA
162	0.000195469	0.000589189	0.328767	0.371876	0.521368	0.437233	0.431089	0.355844	UD	1	150	22019	NA	NA
163	0.892135	0.89957	0.0140845	0.0064	0.0170455	0.0121493	0.0195319	0.0182771	NS	NA	1500	29905	NA	NA
164	9.98362e-07	4.85984e-06	0.359307	0.399863	0.460662	0.409186	0.379277	0.493676	UD	2	1528	35654	8	9.61
165	0.00129535	0.00323646	0.027933	0.0103306	0.0153846	0.0286298	0.054864	0.00767678	UD	1	1528	66016	8	9.61
166	8.50211e-08	5.18078e-07	0.084507	0.0607674	0.0392308	0.0502178	0.0824271	0.0414966	BD	1	1532	1229244	5	26.37
167	0.0577007	0.0864999	0.0222222	0.0400216	0.0259957	0.0312206	0.0361311	0.0409538	NS	NA	1532	1421300	5	26.37
168	0.0056875	0.0118071	0.0293542	0.00573368	0.0217825	0.0157103	0.0180277	0.0204922	UD	1	1532	150752	5	26.37
169	0.00288475	0.00656824	0.0740741	0.0371622	0.0446576	0.0269632	0.025895	0.0278389	G	1	1532	1585272	5	26.37
170	0.76647	0.786909	0.0102041	0.00828296	0.0103695	0.0109034	0.0152958	0.0180004	NS	NA	1532	1685398	5	26.37
171	0.44421	0.485479	0.0625	0.0695594	0.0497617	0.0797263	0.0570797	0.086818	NS	NA	1532	237203	5	26.37
172	0.004638	0.00992017	0.0433071	0.0180302	0.0288297	0.015919	0.0342488	0.0201693	G	1	1533	123315	NA	NA
173	0.0757647	0.10951	0.0128755	0.0138506	0.0135946	0.00916301	0.00146199	0.00343532	NS	NA	154	28261	NA	NA
174	0.014168	0.0255326	0.373737	0.502169	0.422479	0.480623	0.452932	0.490477	G	3	1546	16145	NA	NA
175	0.595241	0.629424	0.21608	0.208017	0.199581	0.176246	0.185932	0.209252	NS	NA	1551	109099	NA	NA
176	1.91121e-15	3.30366e-14	0.169118	0.0569052	0.10495	0.0806934	0.0554062	0.171329	BD	2	1551	143481	NA	NA
177	0.012225	0.02251	0.157407	0.143889	0.107193	0.159185	0.101159	0.147861	BD	2	1551	231723	NA	NA
178	0.254283	0.303349	0.0191083	0.020055	0.00641026	0.0190169	0.0120762	0.0282356	NS	NA	156	121694	NA	NA
179	0.231887	0.281791	0.0516129	0.0744846	0.0794745	0.0803489	0.0536722	0.0646896	NS	NA	157	27990	NA	NA
180	2.5719e-05	9.47129e-05	0.101266	0.0792291	0.0644637	0.050847	0.078172	0.0279596	UD	1	157	541855	NA	NA
181	0.000185158	0.000564131	0.0224719	0.0303452	0.0405552	0.107785	0.084387	0.0328653	UD	3	1572	170943	NA	NA
182	1.01905e-08	7.44081e-08	0.0823529	0.0998771	0.111269	0.090074	0.0845605	0.0372707	UD	1	1572	171478	NA	NA
183	3.23755e-07	1.76917e-06	0.0649351	0.0578284	0.0589256	0.0570651	0.036928	0.091418	BD	2	1579	479236	7	35.33
184	0.000118773	0.000379626	0.32	0.327999	0.322237	0.335607	0.335341	0.250449	UD	1	1581	58570	NA	NA
185	0.418534	0.464003	0.037594	0.0427301	0.0653896	0.0340097	0.0383986	0.0269513	NS	NA	1583	1073918	NA	NA
186	0.00736715	0.0146478	0.079646	0.0394714	0.0338251	0.038684	0.0734127	0.0588497	G	1	1583	911858	NA	NA
187	0.756765	0.777889	0.0405405	0.042031	0.0563262	0.0554295	0.0855555	0.0410075	NS	NA	1583	989618	NA	NA
188	0.261986	0.310787	0.0165746	0.0108549	0.00820475	0.0151945	0.0145443	0.024626	NS	NA	1585	203494	NA	NA
189	5.6855e-07	2.90098e-06	0.453782	0.477565	0.39767	0.468279	0.527649	0.357213	UD	5	1585	269035	NA	NA
190	0.993012	0.995363	0.0106952	0.0146157	0.0132936	0.00802926	0.00966884	0.0105711	NS	NA	1585	32505	NA	NA
191	6.46459e-05	0.000218148	0.0248447	0.00730685	0	0.0174574	0.0376832	0.00720454	UD	1	1586	98664	NA	NA
192	0.000860918	0.00224368	0.34127	0.447002	0.454189	0.573272	0.536387	0.478128	G	3	1588	213947	NA	NA
193	0.00966376	0.0184351	0.0147601	0.0108468	0.00980438	0.0219429	0.0248821	0.00669343	G	1	1592	91193	NA	NA
194	0.00172962	0.00411514	0.134228	0.128764	0.137353	0.146383	0.147155	0.203645	UD	2	1599	1225063	7	72.51
195	3.63213e-07	1.9595e-06	0.0629213	0.104354	0.0774481	0.248742	0.217988	0.125069	UD	3	1599	1251510	7	72.51
196	0.0173038	0.0304072	0.0224719	0.0491121	0.030079	0.045313	0.0316085	0.0209872	G	1	1599	148693	7	72.51
197	3.71754e-11	3.98576e-10	0.2	0.227033	0.322168	0.372117	0.163655	0.272708	BD	4	1599	540199	7	72.51
198	0.177907	0.227281	0.0245098	0.0080421	0.00580423	0.00647589	0.0124593	0.0116258	NS	NA	1600	203278	7	64.35
199	0.0956144	0.135285	0.205882	0.171519	0.125592	0.175087	0.129719	0.193064	NS	NA	1601	248297	NA	NA
200	0.00138012	0.00340844	0.0672646	0.0257291	0.0236606	0.0288433	0.0668277	0.0446197	UD	1	1603	207898	NA	NA
201	4.0568e-05	0.000142639	0.261682	0.297663	0.228391	0.22685	0.35124	0.254316	BD	5	1609	176198	NA	NA
202	7.71503e-18	1.55586e-16	0.26	0.318162	0.269579	0.377043	0.36011	0.298113	BD	3	1627	174622	NA	NA
203	4.16491e-06	1.84695e-05	0.0727273	0.0756051	0.0634441	0.0982498	0.143171	0.049897	UD	1	1630	234797	NA	NA
204	0.0705331	0.103718	0.0392157	0.00871711	0.0228593	0.0114695	0.00921138	0.0028169	NS	NA	1631	98658	NA	NA
205	7.67467e-06	3.25022e-05	0.160714	0.058113	0.0498057	0.0417116	0.0755107	0.0553045	UD	1	1633	47521	NA	NA
206	4.5666e-05	0.000158521	0.0285714	0.00490196	0.020202	0.0162544	0.0366006	0.0162692	UD	1	1639	74030	NA	NA
207	7.87349e-09	5.79899e-08	0.263959	0.260824	0.350159	0.280956	0.161322	0.325796	BD	4	164	312038	NA	NA
208	0.407901	0.453402	0.0860927	0.0512586	0.088182	0.0525207	0.0474684	0.0529103	NS	NA	164	71516	NA	NA
209	0.00582013	0.0120235	0.0172414	0.00573477	0.018648	0.0106378	0.0261541	0.00711754	UD	1	1641	154823	NA	NA
210	6.57236e-07	3.26294e-06	0.0106383	0.0396832	0.0308866	0.0457403	0.0231432	0.00379332	G	1	1647	62823	NA	NA
211	0.000214617	0.000637828	0.0143885	0.0159446	0.0315065	0.0172263	0.0366667	0.0487322	G	1	165	151322	4	9.1
212	2.52973e-08	1.74201e-07	0.336449	0.274983	0.19213	0.199885	0.357392	0.231467	BD	5	167	215	NA	NA
213	2.22697e-09	1.80722e-08	0.03	0.0611957	0.0639927	0.0547847	0.190369	0.0619912	BD	5	1670	85671	NA	NA
214	0.000385036	0.00108708	0.283582	0.256259	0.208371	0.138758	0.139602	0.186242	G	2	1676	2864	NA	NA
215	0.402359	0.448418	0.317181	0.283876	0.335415	0.296831	0.285451	0.314235	NS	NA	1682	122302	NA	NA
216	4.86626e-06	2.13561e-05	0.234615	0.112752	0.155949	0.198094	0.251909	0.137583	UD	5	169	198606	NA	NA
217	3.136e-05	0.000113029	0.0913706	0.0378671	0.0654829	0.0392529	0.071963	0.0394053	BD	1	170	100863	NA	NA
218	5.3841e-05	0.000183884	0.0153846	0.0128936	0.0161207	0.110105	0.0317557	0.0341621	UD	3	1700	10594	NA	NA
219	0.0488097	0.075574	0.0666667	0.107403	0.130751	0.0843298	0.127183	0.10003	NS	NA	1701	50775	NA	NA
220	6.71771e-05	0.000224576	0.0390625	0.00610221	0.018905	0.00419004	0.048407	0.0133292	BD	1	1703	450150	NA	NA
221	2.5247e-11	2.81371e-10	0.342697	0.302019	0.361743	0.2738	0.264352	0.348991	BD	2	1703	711966	NA	NA
222	2.19034e-08	1.53324e-07	0.0143113	0.00478591	0.0163631	0.00598802	0.0180095	0.00418795	BD	1	1707	91302	NA	NA
223	0.00351741	0.00777872	0.0114943	0.0145708	0.0150265	0.0212691	0.00452241	0.0177348	UD	2	1710	559968	6	101
224	0.0701289	0.103303	0.183333	0.178498	0.173092	0.202059	0.262687	0.199422	NS	NA	1714	78637	NA	NA
225	1.01962e-18	2.21441e-17	0.116071	0.13963	0.19055	0.164581	0.0936426	0.252466	UD	4	1715	470237	1	40.77
226	0.00351724	0.00777872	0.12	0.126065	0.206481	0.11465	0.116832	0.147739	BD	2	1720	234701	NA	NA
227	1.12486e-05	4.55866e-05	0.047619	0.07051	0.108349	0.0698242	0.0518069	0.091869	BD	2	1720	47759	NA	NA
228	2.69476e-21	7.36279e-20	0.113924	0.154629	0.194036	0.332101	0.293114	0.13038	UD	3	1720	49203	NA	NA
229	3.45287e-18	7.31145e-17	0.5	0.584665	0.54902	0.557483	0.473864	0.366871	UD	3	1726	99778	NA	NA
230	0.318371	0.368388	0.0917031	0.089799	0.0892246	0.10376	0.087659	0.0683148	NS	NA	1734	144513	NA	NA
231	7.49041e-10	6.47385e-09	0.0702341	0.0980514	0.124616	0.140835	0.057216	0.0780366	UD	2	1736	53849	NA	NA
232	0.0319424	0.0519294	0.0223881	0.0387014	0.0276496	0.0210653	0.0125346	0.0158618	NS	NA	1738	128971	6	89.19
233	0.00865296	0.0169654	0.135294	0.153879	0.102758	0.139897	0.1273	0.0942039	G	1	1738	189596	6	89.19
234	0.000781024	0.00205443	0.428571	0.364432	0.409524	0.491946	0.461498	0.358374	G	1	1738	82461	6	89.19
235	0.0535277	0.0812509	0.105263	0.0596231	0.0765238	0.0626911	0.0550112	0.046906	NS	NA	1740	198189	NA	NA
236	0.000141453	0.000440482	0.166667	0.106262	0.163806	0.115074	0.162068	0.0804136	UD	1	1742	266045	1	0
237	0.10607	0.147293	0.0275862	0.0500281	0.0868322	0.0621644	0.0345748	0.0500043	NS	NA	1746	171405	NA	NA
238	1.92255e-13	2.66951e-12	0.12931	0.166632	0.187922	0.183384	0.110043	0.277948	UD	4	1750	441815	NA	NA
239	1.65914e-06	7.80719e-06	0.428571	0.463307	0.425374	0.395015	0.451967	0.378909	UD	1	1751	235024	NA	NA
240	0.165888	0.215171	0.0306748	0.0222824	0.0156086	0.0412399	0.0386775	0.0288125	NS	NA	1761	3947	NA	NA
241	0.00495162	0.0104589	0.0638298	0.0401936	0.0545455	0.0455202	0.0561652	0.0855387	G	2	1763	243780	NA	NA
242	0.00495162	0.0104589	0.0638298	0.0401936	0.0545455	0.0455202	0.0561652	0.0855387	G	2	1763	243803	NA	NA
243	0.00980215	0.018657	0.0373832	0.0283179	0.0710145	0.0135902	0.0389094	0.020687	UD	1	1763	246480	NA	NA
244	0.103813	0.144621	0.0179372	0.00745171	0.0126845	0.0128337	0.0167317	0.01302	NS	NA	177	163294	NA	NA
245	6.64806e-06	2.88765e-05	0.184	0.10407	0.0840544	0.0989686	0.159043	0.169483	UD	1	177	311689	NA	NA
246	3.57786e-13	4.52305e-12	0.308824	0.19063	0.173489	0.15347	0.0789281	0.188977	BD	2	1780	140802	4	0
247	0.753497	0.776414	0.0217391	0.0153914	0.0131636	0.0160643	0.0171519	0.0179346	NS	NA	1780	14231	4	0
248	0.333841	0.381597	0.0238095	0.0255379	0.0365147	0.0442219	0.0298502	0.0420988	NS	NA	1780	317104	4	0
249	0.00381359	0.00830363	0.025	0.00669773	0.00357143	0.0142416	0.0327136	0.00976647	UD	1	1782	64161	NA	NA
250	7.60351e-09	5.69927e-08	0.0845666	0.145018	0.13972	0.296043	0.214746	0.130802	UD	3	1785	705978	3	78.78
251	0.604155	0.638054	0.0138889	0.0126015	0.0129226	0.0113613	0.00378579	0.0120042	NS	NA	1785	928885	3	78.78
252	5.81022e-10	5.23538e-09	0.0403458	0.015431	0.035848	0.0226486	0.044289	0.0155505	BD	1	1786	188811	NA	NA
253	3.69904e-05	0.000132198	0.202381	0.134476	0.180667	0.150182	0.073227	0.0869616	G	2	1789	17687	NA	NA
254	0.000237395	0.000693358	0.0606061	0.0766602	0.0753171	0.0607154	0.120808	0.0762333	UD	1	1791	165447	NA	NA
255	6.80478e-06	2.94064e-05	0.121622	0.15689	0.165089	0.144537	0.100254	0.218063	UD	2	1802	24001	4	52.66
256	0.000716021	0.00190116	0.366071	0.254644	0.225596	0.261388	0.28513	0.236425	UD	1	1804	319505	1	0.43
257	0.071313	0.104502	0.038674	0.0268513	0.015299	0.0183534	0.0232372	0.0157609	NS	NA	1806	70147	NA	NA
258	0.00128328	0.0032158	0.0609756	0.0616513	0.0206612	0.0574255	0.05012	0.0950562	UD	2	1810	31538	NA	NA
259	0.00199635	0.00471005	0.0314961	0.00700525	0.0625	0.0161549	0.0507998	0.015376	UD	1	1813	55215	NA	NA
260	0.730907	0.756819	0.0162602	0.0144157	0.0315462	0.0130071	0.0349003	0.0243249	NS	NA	1827	137862	NA	NA
261	0.538601	0.57383	0.0147059	0.0257576	0.0111818	0.00867766	0.0208333	0.00740964	NS	NA	1832	141708	NA	NA
262	0.0563852	0.0848281	0.283105	0.271385	0.211837	0.210411	0.253413	0.247099	NS	NA	1834	78539	1	32.21
263	0.00209693	0.00491994	0.0395257	0.0302713	0.0503484	0.0272814	0.0456557	0.0572392	UD	1	1835	62587	NA	NA
264	9.67941e-06	3.94157e-05	0.0273109	0.00378549	0.0149274	0.00957032	0.0205908	0.0178657	BD	1	1836	1041292	NA	NA
265	0.000472314	0.0013031	0.0727848	0.0669535	0.0473467	0.045759	0.0351405	0.0435022	G	2	1855	23014	NA	NA
266	0.000552486	0.00149986	0.0612245	0.11783	0.0929881	0.093369	0.0617051	0.124455	UD	2	1857	160100	NA	NA
267	0.428864	0.474214	0.0353982	0.0366682	0.012863	0.0512922	0.0349352	0.0321153	NS	NA	1858	67804	NA	NA
268	1.66299e-13	2.34759e-12	0.0790698	0.0743312	0.0206993	0.0845334	0.114836	0.0405668	BD	1	186	149868	1	43.17
269	0.111963	0.154955	0.0879121	0.0207254	0.0270833	0.0237197	0.0263572	0.0397126	NS	NA	1860	110042	NA	NA
270	0.0877921	0.125396	0.010989	0.0279034	0.0520833	0.0293514	0.00609756	0.0167246	NS	NA	1860	110061	NA	NA
271	0.0210105	0.0358066	0.0864198	0.0819523	0.1	0.0740179	0.111329	0.117118	G	1	1861	31034	NA	NA
272	2.71883e-07	1.52507e-06	0.0179641	0.049897	0.00925926	0.0447898	0.028688	0.0152263	UD	1	1862	651322	7	73.83
273	3.04108e-06	1.3701e-05	0.0395095	0.0145373	0.0228226	0.0205277	0.0619717	0.0278351	BD	1	1863	181584	NA	NA
274	2.64381e-08	1.80589e-07	0.268908	0.300922	0.255242	0.325129	0.327511	0.235965	UD	3	1863	385570	NA	NA
275	0.000451205	0.00125302	0.0923077	0.0959603	0.111058	0.121564	0.116314	0.202378	UD	2	1865	20769	NA	NA
276	0.879356	0.887741	0.164773	0.129187	0.160715	0.147184	0.147694	0.175059	NS	NA	1865	333470	NA	NA
277	0.00988984	0.018657	0.0733333	0.0813814	0.0783971	0.0657341	0.0583391	0.0549452	G	1	1870	160441	NA	NA
278	1.15448e-05	4.63435e-05	0.023622	0.0191749	0.0214803	0.0625161	0.0530918	0.0670348	G	2	1870	172289	NA	NA
279	0.236193	0.284574	0.0117647	0.0349352	0.0501078	0.0303805	0.0307303	0.0295271	NS	NA	1871	113303	NA	NA
280	0.0274675	0.0452625	0.0982906	0.119606	0.124335	0.220107	0.193675	0.0853724	UD	3	1872	91958	NA	NA
281	0.106079	0.147293	0.0369393	0.018581	0.0136322	0.0251838	0.0284134	0.021188	NS	NA	1888	220184	NA	NA
282	0.0738562	0.107855	0.0447761	0.0611017	0.0706265	0.0614792	0.0479261	0.0948838	NS	NA	189	410935	NA	NA
283	0.0125592	0.0230751	0.505102	0.387358	0.39732	0.4233	0.351726	0.440185	G	2	1891	3873	6	75.18
284	0.000397659	0.001119	0.454887	0.498767	0.427283	0.526889	0.518691	0.391966	G	3	1892	213494	NA	NA
285	0.00937503	0.018088	0.0298507	0.0120838	0.0150821	0.0162969	0.0676471	0.0197523	BD	1	1894	15280	NA	NA
286	3.74308e-42	7.92598e-40	0.206612	0.301918	0.446418	0.525773	0.235447	0.251155	BD	4	1897	106189	NA	NA
287	0.637341	0.668931	0.013245	0.0130685	0.00508929	0.0102937	0.0147993	0.00745281	NS	NA	1897	525738	NA	NA
288	4.31683e-12	5.29907e-11	0.0675676	0.110263	0.0960402	0.196254	0.22629	0.083247	BD	3	1898	128411	NA	NA
289	0.000226243	0.000665375	0.0407407	0.111895	0.0898873	0.109052	0.0704412	0.104133	UD	2	1899	237948	7	68.19
290	0.000711977	0.00190116	0.145349	0.0998915	0.083136	0.069218	0.0982991	0.0983619	G	1	191	119904	NA	NA
291	0.0532336	0.0810076	0.0217391	0.0177433	0.0126782	0.0165315	0.0112053	0.00744295	NS	NA	191	722056	NA	NA
292	0.00313742	0.00710534	0.0238095	0.0151603	0.0211006	0.0381435	0.0315299	0.0196037	G	1	193	235486	NA	NA
293	0.00612617	0.0125033	0.0187266	0.0114704	0.012973	0.0116936	0.00463385	0.019627	UD	2	198	1482464	6	102.78
294	0.000376637	0.00106693	0.0864198	0.0945249	0.0867659	0.118348	0.106884	0.0672542	UD	1	200	104800	NA	NA
295	0.856766	0.870899	0.0529412	0.0510347	0.0436573	0.0462091	0.0351344	0.0437236	NS	NA	203	160067	NA	NA
296	0.280756	0.328908	0.0909091	0.107012	0.105883	0.125853	0.0831731	0.103434	NS	NA	203	470969	NA	NA
297	0.000402584	0.0011291	0.057971	0.0243165	0.0190102	0.0323034	0.0674107	0.0241809	BD	1	203	663064	NA	NA
298	0.0580498	0.0868696	0.0490798	0.0367973	0.0408781	0.0279328	0.0329141	0.0195662	NS	NA	204	183546	1	0
299	0.138825	0.186642	0.323529	0.304792	0.301374	0.274614	0.279749	0.304715	NS	NA	204	777210	1	0
300	0.269024	0.318245	0.0340909	0.0122787	0.0337245	0.0239833	0.0126197	0.0171851	NS	NA	204	803447	1	0
301	6.07448e-10	5.41588e-09	0.376518	0.358144	0.429359	0.378951	0.433924	0.274417	UD	5	209	173843	NA	NA
302	0.001397	0.00342973	0.269231	0.355183	0.372271	0.41874	0.461709	0.350607	UD	3	211	1248106	3	99.91
303	0.204232	0.253397	0.0666667	0.0797531	0.104868	0.0651022	0.0735689	0.10582	NS	NA	213	166078	NA	NA
304	1.25277e-14	1.92927e-13	0.04	0.0668535	0.0411491	0.12806	0.107246	0.0399201	BD	3	21696	1052	NA	NA
305	0.116319	0.159923	0.0197368	0.0231182	0.0123967	0.00633414	0.00401235	0.00930869	NS	NA	219	158016	NA	NA
306	0.00785849	0.0155155	0.111111	0.0515878	0.0636218	0.0772134	0.0530419	0.0349126	G	1	219	262768	NA	NA
307	0.610177	0.643612	0.0898876	0.148111	0.13623	0.141985	0.159119	0.133337	NS	NA	219	449039	NA	NA
308	0.0669993	0.0990373	0.0490196	0.0129792	0.0135434	0.0277079	0.0451369	0.0290481	NS	NA	22	552557	4	60.27
309	7.52713e-09	5.69239e-08	0.0454545	0.0572471	0.118233	0.0530105	0.0226758	0.0384472	BD	2	221	37600	NA	NA
310	0.00259516	0.00595691	0.0694444	0.0529557	0.15543	0.11932	0.070625	0.100629	UD	2	221	47788	NA	NA
311	0.00179376	0.00425577	0.05	0.0434318	0.0532732	0.0423164	0.0896223	0.0313708	BD	1	223	300544	NA	NA
312	0.00590928	0.012178	0.0372671	0.0152388	0.015003	0.0257828	0.0289642	0.0337888	UD	1	223	5302	NA	NA
313	0.231333	0.281791	0.0278638	0.0313227	0.0139516	0.020345	0.016347	0.0311748	NS	NA	230	130825	NA	NA
314	0.0045732	0.00980633	0.0210526	0.076098	0.0534188	0.0374887	0.0796883	0.0406224	G	1	232	1330	NA	NA
315	0.11872	0.162186	0.354839	0.384345	0.319138	0.343483	0.339527	0.32959	NS	NA	236	197458	NA	NA
316	1.21445e-09	1.00847e-08	0.350649	0.511066	0.461391	0.534167	0.525894	0.440663	UD	3	236	34126	NA	NA
317	0.000141235	0.000440482	0.229167	0.239489	0.281276	0.285454	0.19598	0.252422	BD	2	237	352435	NA	NA
318	0.054372	0.0820911	0.0208333	0.03743	0.0398441	0.0144583	0.0111334	0.00989475	NS	NA	241	19470	6	43.92
319	1.1554e-11	1.34058e-10	0.504505	0.550119	0.408106	0.317494	0.400934	0.375318	UD	1	241	799422	6	51.74
320	0.23374	0.282521	0.0331126	0.0426076	0.0207735	0.0386213	0.037638	0.0229679	NS	NA	242	96761	NA	NA
321	2.72984e-32	1.65155e-30	0.038961	0.103728	0.0839773	0.0884424	0.0759103	0.229691	UD	2	248	205217	NA	NA
322	8.06433e-07	3.97121e-06	0.163636	0.220662	0.235094	0.287407	0.096714	0.185219	UD	4	257	272907	NA	NA
323	0.819375	0.835152	0.295181	0.301997	0.303914	0.330406	0.31127	0.307901	NS	NA	257	484140	NA	NA
324	0.060936	0.0908291	0.25	0.224558	0.177316	0.182073	0.223705	0.195114	NS	NA	257	99001	NA	NA
325	1.3497e-06	6.42245e-06	0.0819672	0.121778	0.0752381	0.04304	0.0624033	0.0217093	UD	1	262	4066	NA	NA
326	0.313217	0.36292	0.443299	0.402621	0.514617	0.454434	0.504088	0.495924	NS	NA	265	52870	NA	NA
327	7.56335e-15	1.20871e-13	0.162037	0.0471444	0.024062	0.0776695	0.125101	0.0440673	BD	1	266	55281	3	2.82
328	9.5979e-10	8.04893e-09	0.140496	0.243286	0.241203	0.316068	0.365668	0.197083	BD	3	267	190449	NA	NA
329	3.19046e-05	0.000114505	0.0621118	0.089017	0.126219	0.0498371	0.0380802	0.045429	UD	2	26708	3205	NA	NA
330	4.59657e-10	4.23184e-09	0.278761	0.318891	0.292422	0.230451	0.33858	0.355663	UD	1	269	158769	NA	NA
331	1.28868e-21	3.63838e-20	0.0232558	0.0567567	0.0908642	0.0640928	0.222074	0.188025	UD	1	271	354388	6	11.11
332	5.4188e-39	7.64954e-37	0.0993789	0.106447	0.116674	0.292225	0.103641	0.107383	BD	3	276	43836	4	70.58
333	0.00662905	0.0132425	0.0212766	0.0148998	0.032468	0.0148218	0.0279512	0.0177953	UD	1	278	19764	NA	NA
334	0.719152	0.745559	0.0120482	0.00941838	0.00434783	0.0136298	0.01452	0.014061	NS	NA	278	45056	NA	NA
335	1.24268e-23	3.62947e-22	0.126623	0.135171	0.15103	0.31717	0.198292	0.12839	BD	3	27804	583	NA	NA
336	0.0226325	0.0381107	0.0361446	0.0174946	0.0126582	0.0209944	0.0444519	0.0387193	G	1	280	951763	NA	NA
337	0.188563	0.238378	0.0125392	0.0156371	0.025105	0.0294227	0.0280294	0.0198255	NS	NA	28470	2693	NA	NA
338	0.000898581	0.00232752	0.0456274	0.0443687	0.0474291	0.0660217	0.0337358	0.0667985	UD	2	286	355402	NA	NA
339	0.00628893	0.0128046	0.0294118	0.00777713	0.0245479	0.0209755	0.0265294	0.0296545	G	1	286	51871	NA	NA
340	0.371904	0.417223	0.0120482	0.0180275	0.0176056	0.013774	0.00850525	0.00925307	NS	NA	3	739487	7	14.6
341	0.0224914	0.0379486	0.189873	0.178021	0.218264	0.166452	0.197345	0.127556	UD	1	301	520140	NA	NA
342	3.76578e-07	2.00605e-06	0.308511	0.413495	0.41067	0.444451	0.498465	0.442342	UD	3	304	104066	3	90.96
343	5.21541e-17	1.00397e-15	0.188172	0.221732	0.329057	0.171851	0.145197	0.289791	BD	2	307	69293	NA	NA
344	0.0686136	0.101247	0.0363036	0.0186821	0.0230545	0.0172303	0.0249441	0.0166198	NS	NA	30712	3503	NA	NA
345	7.68629e-09	5.71078e-08	0.137097	0.245542	0.208302	0.345068	0.285429	0.238893	UD	3	308	223985	NA	NA
346	3.94506e-05	0.00013981	0.137705	0.146587	0.156538	0.164437	0.190332	0.210152	G	1	313	416096	NA	NA
347	0.390253	0.437228	0.0215827	0.0133237	0.0292781	0.0127771	0.0254969	0.0188951	NS	NA	314	60656	NA	NA
348	5.19166e-08	3.46005e-07	0.0909091	0.15667	0.174993	0.223075	0.244739	0.168022	UD	3	315	559053	10	82.43
349	2.47052e-10	2.40521e-09	0.0515625	0.0180222	0.0215501	0.0249861	0.0445079	0.0224026	BD	1	317	6535	NA	NA
350	0.0129015	0.0236017	0.0392157	0.0412926	0.0342045	0.03991	0.0273631	0.0251455	G	1	31834	3687	NA	NA
351	0.0648481	0.0960251	0.0405405	0.0741125	0.0354406	0.0602373	0.11244	0.0362274	NS	NA	32	180856	NA	NA
352	2.27346e-05	8.48291e-05	0.0954545	0.0679654	0.103826	0.0484936	0.0866771	0.0730039	BD	1	321	618237	6	65.8
353	0.0935419	0.132714	0.0468165	0.0207357	0.0165273	0.0221924	0.0274159	0.03011	NS	NA	323	180542	NA	NA
354	1.77592e-08	1.27475e-07	0.258065	0.169897	0.15578	0.130616	0.219238	0.209055	UD	1	32526	6862	NA	NA
355	0.0441379	0.0689757	0.0704225	0.0752282	0.0598259	0.053785	0.102919	0.0691849	NS	NA	32546	11296	NA	NA
356	0.191778	0.24208	0.45679	0.467993	0.389459	0.423963	0.424068	0.403154	NS	NA	32838	12703	NA	NA
357	0.115615	0.159229	0.0737705	0.0556759	0.0639597	0.0833856	0.0846858	0.0835184	NS	NA	32848	2645	NA	NA
358	0.00484072	0.0102759	0.0247934	0.0206166	0.0160173	0.0212793	0.0261446	0.0437915	G	2	32906	3313	NA	NA
359	7.75992e-85	6.57265e-82	0.102128	0.0191575	0.057423	0.0309939	0.159794	0.0473504	BD	5	332	192830	6	104.21
360	0.198752	0.24866	0.0217391	0.00524401	0.0145541	0.0134953	0.00641026	0.0152807	NS	NA	332	498094	6	104.21
361	1.95731e-06	9.00999e-06	0.1	0.0575818	0.0981759	0.0801978	0.0327349	0.0317008	UD	2	334	547600	NA	NA
362	7.21698e-05	0.000239717	0.0555556	0.0355548	0.0564887	0.0183083	0.0343428	0.089139	G	2	33614	9794	NA	NA
363	0.00661534	0.0132425	0.0601093	0.0404845	0.0528523	0.0364967	0.0332908	0.0258933	G	1	33618	5343	NA	NA
364	0.00121084	0.0030706	0.0775194	0.124007	0.117803	0.0852698	0.10542	0.0795838	G	1	337	665584	8	26.18
365	4.05855e-05	0.000142639	0.044898	0.0972084	0.0883021	0.106799	0.0450677	0.0671261	UD	2	33732	12402	NA	NA
366	4.01215e-09	3.08936e-08	0.333333	0.268549	0.308759	0.239681	0.135484	0.133168	UD	2	33748	7595	NA	NA
367	3.77244e-05	0.000134254	0.0837989	0.089153	0.114072	0.0470137	0.0753771	0.10154	UD	2	338	218713	NA	NA
368	0.0756563	0.10951	0.0125	0.0545695	0.0346877	0.0573281	0.0583487	0.027587	NS	NA	33892	12306	NA	NA
369	0.0707886	0.103913	0.0166667	0.0431176	0.0133929	0.04286	0.0521761	0.0361585	NS	NA	33960	12611	NA	NA
370	0.749556	0.773293	0.037037	0.0340897	0.0381886	0.0312042	0.0676867	0.0273218	NS	NA	34	446471	NA	NA
371	1.04051e-10	1.06182e-09	0.0606061	0.16869	0.0677803	0.252912	0.235594	0.211288	BD	3	34348	4889	NA	NA
372	1.48058e-32	1.04504e-30	0.0860927	0.0662281	0.00387597	0.0019802	0	0.0586785	UD	2	34356	7016	NA	NA
373	0.420396	0.465458	0.0491803	0.0216427	0.0347707	0.0440047	0.0527233	0.033823	NS	NA	34738	11093	NA	NA
374	2.24509e-05	8.41411e-05	0.0683761	0.056067	0.0424448	0.0393713	0.035784	0.0740336	UD	2	34902	8666	NA	NA
375	0.00350974	0.00777872	0.0519481	0.0389627	0.012123	0.021571	0.0305801	0.0294313	G	1	351	297909	9	27.94
376	0.204333	0.253397	0.0294118	0.0136674	0.0269598	0.00977517	0.00975038	0.0163919	NS	NA	351	301198	9	27.94
377	1.41338e-19	3.32537e-18	0.231884	0.317675	0.574151	0.433345	0.18382	0.369193	BD	4	351	747925	9	27.94
378	0.0215476	0.0365748	0.285714	0.284271	0.276351	0.258636	0.286921	0.348746	G	2	35172	14717	NA	NA
379	0.0356556	0.0575243	0.0215827	0.0107249	0.0299291	0.0267622	0.0434092	0.025404	NS	NA	354	138907	8	58.94
380	0.521259	0.556054	0.0931373	0.0862571	0.0786892	0.0899023	0.0996591	0.0838898	NS	NA	354	223953	8	58.94
381	0.00955175	0.0183454	0.0851064	0.0816214	0.107659	0.0549974	0.0850389	0.0522888	G	1	354	603805	8	58.94
382	0.348531	0.395718	0.0540541	0.0346314	0.0191142	0.0293586	0.0241565	0.0370299	NS	NA	354	990834	8	58.94
383	0.000462275	0.00127957	0.0306122	0.0230515	0.0202703	0.0306219	0.0158117	0.00921884	G	1	35794	23489	NA	NA
384	7.14221e-08	4.50444e-07	0.0451128	0.0585062	0.154503	0.032748	0.0245482	0.0194737	BD	2	36028	18838	NA	NA
385	0.000439205	0.00122371	0.141553	0.0897469	0.119436	0.0958547	0.120382	0.111215	BD	1	36070	16450	NA	NA
386	1.30742e-13	1.87693e-12	0.243478	0.232822	0.174738	0.244113	0.209339	0.134897	BD	3	361	431902	NA	NA
387	0.00353065	0.00778765	0.285714	0.172581	0.178215	0.255452	0.206186	0.182755	G	1	36210	18161	NA	NA
388	0.0109488	0.0203817	0.0411523	0.0076306	0.00623053	0.0140229	0.0267657	0.0108346	G	1	363	429129	NA	NA
389	0.461344	0.500865	0.0491803	0.0457927	0.0626006	0.0643727	0.0405764	0.0351191	NS	NA	36406	23401	NA	NA
390	0.0175262	0.0306963	0.0552326	0.0260907	0.0499025	0.0561342	0.0433176	0.0377004	G	1	365	296287	NA	NA
391	0.000140358	0.000440309	0.0183486	0.0095711	0	0.0125584	0.0130359	0.0195883	G	1	36536	29345	NA	NA
392	1.35513e-05	5.33858e-05	0.0222222	0.00116144	0.00622673	0.0127198	0.0324311	0.0108558	BD	1	36664	33137	NA	NA
393	3.20877e-11	3.52965e-10	0.0357143	0.0435334	0.0667604	0.0417188	0.0303407	0.112989	UD	2	36716	12848	NA	NA
394	7.17945e-08	4.50444e-07	0.103659	0.122246	0.201515	0.162234	0.0564329	0.161013	BD	4	36794	19482	NA	NA
395	0.00983694	0.018657	0.0175439	0.0529831	0.0523562	0.0704788	0.0522527	0.0388265	G	1	368	379129	8	29.87
396	0.00079563	0.00207993	0.0490566	0.057702	0.0395164	0.0444515	0.0598293	0.0217416	UD	1	368	383907	8	29.87
397	0.00327588	0.00735987	0.412162	0.376281	0.382706	0.27274	0.335623	0.370566	UD	2	36904	5434	10	97.73
398	0.00989021	0.018657	0.0153846	0.0121269	0.0169492	0.0250285	0.0233869	0.0492316	G	2	36970	39206	NA	NA
399	0.00254592	0.00587574	0.0869565	0.0551255	0.0770308	0.0716665	0.0677814	0.0251307	UD	1	37	182780	NA	NA
400	0.309602	0.359223	0.192593	0.155292	0.212559	0.172394	0.17176	0.126328	NS	NA	370	234315	NA	NA
401	4.05658e-10	3.77574e-09	0.157025	0.193587	0.149742	0.140775	0.276323	0.109054	BD	5	37134	24401	NA	NA
402	0.0254587	0.0424354	0.0410959	0.0189158	0.0273707	0.0163987	0.0163636	0.0490856	G	2	374	163774	NA	NA
403	0.143497	0.191706	0.0226244	0.0517892	0.0478294	0.0503422	0.0608342	0.0409958	NS	NA	374	540532	NA	NA
404	8.31754e-08	5.10504e-07	0.0451613	0.00927757	0.0514652	0.0339034	0.0357821	0.0146274	BD	1	37422	14494	NA	NA
405	1.75161e-05	6.71319e-05	0.191781	0.236738	0.264647	0.201404	0.264573	0.192084	BD	1	37576	20957	NA	NA
406	0.622352	0.654822	0.0238095	0.0319657	0.0281047	0.0172832	0.0205122	0.0346812	NS	NA	37678	37844	NA	NA
407	0.0492161	0.0759308	0.39759	0.333835	0.3451	0.384824	0.328577	0.31425	NS	NA	37680	43830	NA	NA
408	0.812986	0.829638	0.0454545	0.0384905	0.041541	0.0384234	0.0330123	0.036345	NS	NA	377	167376	NA	NA
409	4.19967e-05	0.000146932	0.128378	0.13321	0.18822	0.117387	0.131217	0.199913	UD	2	37746	24400	NA	NA
410	3.35828e-13	4.30979e-12	0.322581	0.442853	0.33925	0.425191	0.483629	0.323468	BD	3	378	252410	6	28.4
411	0.116713	0.159961	0.0529801	0.0276134	0.0395332	0.0298131	0.0328634	0.050709	NS	NA	378	276053	6	28.4
412	0.196248	0.24662	0.142857	0.134469	0.0940376	0.13831	0.11635	0.110459	NS	NA	37900	25227	NA	NA
413	0.00149522	0.00363922	0.401163	0.482386	0.441211	0.479868	0.493096	0.424483	G	3	37900	8547	NA	NA
414	5.1672e-26	1.75065e-24	0.186047	0.160789	0.241176	0.321799	0.235411	0.157741	BD	3	37968	25255	NA	NA
415	0.0144702	0.0260217	0.0608108	0.0577215	0.0340321	0.022563	0.0395935	0.0281683	G	1	38	59	NA	NA
416	1.53381e-05	5.95934e-05	0.22	0.1564	0.145006	0.107562	0.159141	0.0661345	UD	1	38078	34171	NA	NA
417	0.27712	0.325097	0.19697	0.241483	0.233227	0.204143	0.18739	0.18101	NS	NA	38090	39932	NA	NA
418	0.461836	0.500865	0.0300752	0.0425448	0.0357103	0.0479288	0.0443587	0.028071	NS	NA	381	249808	NA	NA
419	8.40762e-05	0.000277092	0.12931	0.0670935	0.0711987	0.040879	0.092795	0.0499621	UD	1	38174	51029	NA	NA
420	0.519922	0.555327	0.020284	0.0224121	0.0183032	0.0247498	0.0125113	0.0211454	NS	NA	38400	28477	NA	NA
421	4.53714e-06	2.00154e-05	0.037594	0.051357	0.0221347	0.0342964	0.0429115	0.00735172	G	1	38438	35725	NA	NA
422	0.0252521	0.0421864	0.224	0.23586	0.298837	0.249113	0.216014	0.228351	G	2	38466	22309	NA	NA
423	1.97874e-06	9.05944e-06	0.159091	0.095257	0.0658116	0.0963905	0.183487	0.116119	BD	1	385	273497	NA	NA
424	2.01954e-08	1.42546e-07	0.329787	0.29108	0.295739	0.322501	0.372757	0.233413	UD	5	38546	7636	NA	NA
425	5.08685e-27	1.95844e-25	0.196721	0.519467	0.504104	0.514866	0.26934	0.466471	BD	4	38558	44043	NA	NA
426	0.0280815	0.0461846	0.0183246	0.0228764	0.0129773	0.025906	0.0501974	0.0256247	G	1	38764	15669	NA	NA
427	0.088592	0.126326	0.026178	0.0278282	0.0261866	0.0302852	0.0231953	0.0447083	NS	NA	388	588333	10	40.53
428	4.08193e-07	2.16087e-06	0.0300429	0.0583673	0.0489465	0.0602974	0.0548948	0.0196447	UD	1	38818	56760	NA	NA
429	2.9936e-13	3.96184e-12	0.0226087	0.0247381	0.0367302	0.073188	0.0112291	0.008692	UD	2	38854	20984	NA	NA
430	0.0118439	0.0219034	0.0852713	0.0445816	0.0454527	0.0767154	0.050242	0.0501875	G	1	38876	20694	NA	NA
431	0.169388	0.219041	0.025	0.00774602	0.0354677	0.0130727	0.0175263	0.0103742	NS	NA	38876	60264	NA	NA
432	1.12183e-07	6.59854e-07	0.0251716	0.0400157	0.0665775	0.0433285	0.0179465	0.0228807	UD	2	39008	787	NA	NA
433	0.00151349	0.00367313	0.0352941	0.0767684	0.0781095	0.0860185	0.049593	0.0557457	UD	2	39030	40905	NA	NA
434	1.22227e-34	1.29407e-32	0.397059	0.387627	0.448231	0.634912	0.463569	0.45879	BD	3	39174	46666	NA	NA
435	4.2154e-05	0.000146932	0.110169	0.0899959	0.0474216	0.0852161	0.121825	0.0499777	UD	1	39240	25332	NA	NA
436	1.41832e-24	4.44931e-23	0.443515	0.469857	0.515114	0.498799	0.611969	0.339986	BD	5	39272	32795	NA	NA
437	1.28714e-32	9.91096e-31	0.490066	0.320933	0.193487	0.412608	0.620632	0.297778	BD	5	39352	39647	NA	NA
438	0.0260874	0.0432407	0.117347	0.0954044	0.131804	0.0734615	0.0935539	0.0969825	G	1	39394	57125	NA	NA
439	0.000353005	0.00101012	0.0338983	0.0146664	0.00952381	0.0170579	0.0181523	0.041013	G	2	39394	61001	NA	NA
440	1.07258e-06	5.1913e-06	0.035	0.00390625	0.0185393	0.0101381	0.0268346	0.00674464	BD	1	39410	68095	NA	NA
441	0.0465808	0.0726592	0.0454545	0.0211058	0.0353535	0.0175292	0.0366363	0.0193009	NS	NA	39412	65036	NA	NA
442	0.356092	0.403222	0.0697674	0.0456846	0.0507723	0.0338556	0.0571212	0.0497744	NS	NA	39514	48187	NA	NA
443	9.19901e-06	3.76404e-05	0.221311	0.273765	0.302976	0.270959	0.149469	0.172856	G	2	396	3825	10	83.71
444	3.03797e-09	2.40482e-08	0.245763	0.158131	0.233942	0.168698	0.157333	0.30123	UD	2	396	416959	10	83.71
445	0.995054	0.996231	0.0111111	0.0137943	0.0114498	0.0138465	0.00659073	0.0117647	NS	NA	396	429067	10	83.71
446	0.112682	0.155696	0.0568182	0.0652815	0.0726801	0.0346555	0.0685036	0.0434837	NS	NA	39986	65829	NA	NA
447	1.2274e-16	2.31023e-15	0.460674	0.363546	0.209979	0.387371	0.570235	0.304159	BD	5	4	582489	3	2.82
448	0.349677	0.396488	0.0394737	0.0169147	0.0236895	0.0254691	0.0177134	0.0218555	NS	NA	40	49765	NA	NA
449	5.48581e-07	2.81605e-06	0.0913978	0.0582695	0.0125	0.0433658	0.124286	0.0897272	UD	1	400	15735	NA	NA
450	0.179309	0.228345	0.029703	0.0441358	0.0353224	0.0430721	0.0360758	0.0223923	NS	NA	40030	51755	NA	NA
451	0.0431035	0.0676041	0.0473373	0.0378297	0.0289446	0.0191837	0.0362678	0.04411	NS	NA	40030	77999	NA	NA
452	0.240575	0.289031	0.0107527	0.0523047	0.0536388	0.0432273	0.0745292	0.0518193	NS	NA	40076	14491	NA	NA
453	7.70553e-08	4.76393e-07	0.052381	0.0294096	0.013841	0.0221591	0.0744794	0.0283077	BD	1	40156	7611	NA	NA
454	9.11986e-12	1.08796e-10	0.2	0.0855656	0.111458	0.127051	0.246193	0.0758693	BD	5	40182	41315	NA	NA
455	9.6876e-08	5.81943e-07	0.0737705	0.111382	0.0955944	0.126626	0.0470097	0.0394579	UD	3	402	193918	3	32.84
456	2.85221e-07	1.57897e-06	0.172996	0.0842612	0.0637497	0.0888353	0.117364	0.0722112	UD	1	402	436816	3	32.84
457	1.31912e-39	2.23458e-37	0.415385	0.378475	0.272382	0.192511	0.574088	0.468391	BD	5	402	474868	3	32.84
458	0.0148068	0.0265144	0.0483871	0.0302782	0.0348445	0.0139574	0.0114229	0.0232087	G	2	40246	78357	NA	NA
459	2.79053e-07	1.55499e-06	0.0662983	0.0405685	0.0881944	0.0422273	0.0396346	0.0161692	UD	1	40368	84888	NA	NA
460	0.857635	0.870899	0.0263158	0.0164379	0.00892857	0.0184747	0.0133765	0.014746	NS	NA	406	279012	3	10.75
461	0.00953688	0.0183454	0.010989	0.00944351	0.0365413	0.0119724	0.00669503	0.0166531	BD	2	40610	6200	NA	NA
462	0.0111585	0.0207264	0.0337079	0.0116077	0.00416667	0.0100334	0.016465	0.0262556	G	1	40624	9212	NA	NA
463	0.0404149	0.0639839	0.0882353	0.146843	0.170635	0.139859	0.141231	0.191377	NS	NA	40658	12114	NA	NA
464	0.0257508	0.0427665	0.0390625	0.0255222	0.00323625	0.0193013	0.0249809	0.0219674	G	1	407	9995	NA	NA
465	0.00205135	0.00482637	0.0151515	0.019997	0.037094	0.0111873	0.0021645	0.00643397	G	2	408	329721	NA	NA
466	0.649867	0.678714	0.0841121	0.0540084	0.0578954	0.0529043	0.0625043	0.0566592	NS	NA	40856	18623	5	61.34
467	6.55522e-11	6.85465e-10	0.3125	0.213282	0.184906	0.17538	0.221879	0.281139	UD	2	40910	12161	NA	NA
468	0.0541008	0.0819738	0.0393939	0.0215464	0.0295096	0.0304558	0.0416423	0.0112821	NS	NA	40950	103223	NA	NA
469	0.125631	0.170597	0.284211	0.377665	0.393939	0.394962	0.306642	0.385509	NS	NA	40980	67884	NA	NA
470	1.28574e-06	6.15269e-06	0.0625	0.0569947	0.0230566	0.0395788	0.0166073	0.0115945	G	1	41162	106886	NA	NA
471	0.00844554	0.0165971	0.0178571	0.0154314	0.0178571	0.032269	0.0176255	0.0040457	G	1	41162	69601	NA	NA
472	5.07525e-07	2.63726e-06	0.133929	0.081637	0.0110746	0.051275	0.117255	0.0674316	BD	1	41220	74839	NA	NA
473	0.000140215	0.000440309	0.185185	0.12588	0.095145	0.139193	0.211567	0.116491	BD	5	413	201594	10	12.01
474	0.0425158	0.0668106	0.0119048	0.0108742	0.0339855	0.0139199	0.0483968	0.0225797	NS	NA	413	272055	10	12.01
475	0.652578	0.680706	0.0221402	0.0165158	0.0199587	0.0198124	0.0163703	0.0139851	NS	NA	41436	70985	NA	NA
476	0.0374224	0.059677	0.0430108	0.0528372	0.0486668	0.0525517	0.0546967	0.0187807	NS	NA	41448	101223	NA	NA
477	0.260455	0.309839	0.0391061	0.0271955	0.0193825	0.0321112	0.022545	0.0369887	NS	NA	41448	70426	NA	NA
478	0.00231386	0.00538417	0.055814	0.0335854	0.0317658	0.036183	0.0957823	0.0471427	BD	1	41472	14853	NA	NA
479	0.00256551	0.00590486	0.0314465	0.0227138	0.00282486	0.00962981	0.0181979	0.0224622	G	1	41540	35205	NA	NA
480	0.342671	0.39011	0.482517	0.470239	0.528413	0.479326	0.475839	0.441257	NS	NA	41560	94853	NA	NA
481	0.0322642	0.0523521	0.0289389	0.0378921	0.00954703	0.0226791	0.023405	0.0269176	NS	NA	41656	11066	NA	NA
482	0.0207915	0.0356485	0.113537	0.0917416	0.0746335	0.0659606	0.0801224	0.0716575	G	1	41700	11676	NA	NA
483	0.198523	0.24866	0.137681	0.150815	0.218614	0.158125	0.128788	0.207111	NS	NA	41732	96612	NA	NA
484	0.754852	0.776865	0.012931	0.00859378	0.00952381	0.0076471	0.0108422	0.0136788	NS	NA	41762	44252	NA	NA
485	0.17278	0.221734	0.0160643	0.00742516	0.0141598	0.00760963	0.0113321	0.0187018	NS	NA	41786	58259	NA	NA
486	0.664566	0.691984	0.0125	0.0151278	0.0147138	0.00922493	0.00981429	0.019239	NS	NA	418	42026	NA	NA
487	0.000619616	0.00167138	0.0578512	0.0235043	0.0186916	0.030739	0.117184	0.0259599	BD	5	41876	121702	NA	NA
488	0.0513366	0.0787719	0.0810811	0.0674607	0.062582	0.0744609	0.104666	0.0922321	NS	NA	41876	35422	NA	NA
489	0.000149927	0.000465157	0.0142857	0.0384135	0.0246106	0.0340229	0.00940381	0.0539688	UD	2	419	1010802	7	8.93
490	0.462557	0.501004	0.0185185	0.0226617	0.0273211	0.0332745	0.0167484	0.0282788	NS	NA	419	1420864	7	8.93
491	0.367243	0.413123	0.0285714	0.026486	0.0284701	0.0264091	0.030216	0.0408805	NS	NA	41972	14621	NA	NA
492	0.125682	0.170597	0.0192308	0.0230489	0.0486272	0.0307819	0.0293704	0.0323234	NS	NA	41998	12420	6	67.15
493	0.00536617	0.0112504	0.0216049	0.0121443	0.00777054	0.0252377	0.0125374	0.00965861	G	1	42046	80928	10	16.13
494	1.60698e-06	7.60399e-06	0.0700637	0.0738882	0.0940993	0.0512746	0.135972	0.101982	UD	1	42090	84454	NA	NA
495	0.16158	0.210876	0.0203046	0.0123703	0.0117777	0.0158493	0.0104203	0.0214675	NS	NA	42112	145704	NA	NA
496	0.560234	0.596128	0.0609756	0.0968323	0.0643116	0.0922427	0.113723	0.0885896	NS	NA	42172	44341	NA	NA
497	0.000107025	0.000347318	0.0123457	0.00829788	0.0324084	0.0661391	0.025665	0.0190325	UD	2	422	357953	3	99.91
498	6.73464e-05	0.000224576	0.0895522	0.193211	0.213078	0.210544	0.10638	0.112214	G	2	42210	128514	NA	NA
499	0.000166239	0.000512017	0.0541401	0.0394802	0.0646844	0.0818158	0.0562621	0.0827379	BD	2	42268	37271	NA	NA
500	7.22277e-06	3.08974e-05	0.014218	0.0297618	0.0301724	0.0410432	0.0117341	0.0622294	BD	2	42272	64393	NA	NA
501	0.203764	0.253397	0.0248756	0.0485195	0.0268643	0.0518579	0.0235746	0.0334622	NS	NA	42306	68064	NA	NA
502	0.17615	0.225717	0.0172414	0.00773916	0.00515464	0.0340072	0.0171337	0.00929794	NS	NA	42306	78281	NA	NA
503	0.494038	0.531703	0.0117647	0.018164	0.00507614	0.0163191	0.0183602	0.00843662	NS	NA	42380	11605	NA	NA
504	0.0209045	0.0356978	0.0204082	0.0343449	0.0484074	0.0259635	0.0296374	0.0189764	G	1	424	34524	NA	NA
505	0.998807	0.998807	0.0199005	0.0108873	0.0215054	0.0140966	0.0177996	0.0177824	NS	NA	425	1030374	10	44.25
506	0.000367206	0.0010437	0.204301	0.253628	0.290597	0.232821	0.197785	0.285863	UD	2	42568	154215	NA	NA
507	0.0128852	0.0236017	0.0595238	0.0835845	0.0688844	0.0587097	0.0231194	0.0345342	G	2	42640	56234	NA	NA
508	0.0299222	0.0491165	0.0483871	0.0121032	0.0348021	0.0179196	0.00629723	0.0340996	G	2	42656	132561	NA	NA
509	2.76529e-13	3.71778e-12	0.270588	0.422993	0.400843	0.565394	0.41311	0.291484	BD	3	42684	176086	8	59.69
510	0.0178885	0.0312403	0.347222	0.449718	0.414746	0.498078	0.382679	0.438088	G	3	42726	107392	NA	NA
511	1.45673e-05	5.68593e-05	0.0720721	0.0251837	0.00964715	0.0268367	0.0657631	0.0351742	UD	1	42740	138245	NA	NA
512	0.0532718	0.0810076	0.061674	0.0372571	0.0197445	0.0338466	0.0459854	0.0439712	NS	NA	42760	21159	NA	NA
513	8.99209e-06	3.71527e-05	0.5	0.482762	0.432074	0.33191	0.460315	0.450854	UD	1	42788	87068	NA	NA
514	0.18735	0.237198	0.0136054	0.0185672	0.0368544	0.0275925	0.0543672	0.0192124	NS	NA	42836	79993	1	36.56
515	8.6074e-05	0.000281485	0.324675	0.175334	0.213071	0.238794	0.367125	0.282564	UD	5	42840	27032	NA	NA
516	6.33588e-08	4.12807e-07	0.0338164	0.0767742	0.0649798	0.0911662	0.104399	0.0329539	UD	1	42850	7864	10	4.05
517	0.00497203	0.0104759	0.0243902	0.00802752	0.0180723	0.0113782	0.0478474	0.0287384	UD	1	42894	168266	NA	NA
518	1.33302e-07	7.68075e-07	0.406061	0.56686	0.482073	0.632355	0.515638	0.460391	UD	3	42924	87404	NA	NA
519	0.00138028	0.00340844	0.0909091	0.0479798	0.0197279	0.0446615	0.0405556	0.022907	G	1	42994	125746	7	3.16
520	0.000973993	0.00250751	0.115942	0.0471105	0.0348662	0.0396848	0.0886767	0.0715071	UD	1	43	246521	8	58.06
521	0.100194	0.140272	0.012931	0.0260447	0.0214611	0.0330289	0.043356	0.0275573	NS	NA	43	426482	8	58.06
522	6.65148e-05	0.000223564	0.015873	0.0352786	0.045405	0.0330851	0.012406	0.0118784	UD	2	43038	20315	NA	NA
523	1.08921e-07	6.45148e-07	0.0597015	0.130972	0.126333	0.14882	0.141137	0.109521	UD	3	43076	200049	NA	NA
524	2.9514e-06	1.33681e-05	0.045045	0.0364129	0.0212452	0.0515029	0.0819087	0.0304781	BD	1	43134	40352	NA	NA
525	0.216644	0.265939	0.0410959	0.0866538	0.0674603	0.0946431	0.0788991	0.0916604	NS	NA	43136	50312	NA	NA
526	0.139066	0.18667	0.0714286	0.0225199	0.035479	0.0295462	0.0694183	0.0320109	NS	NA	43150	46406	NA	NA
527	0.040571	0.0641113	0.0319149	0.0238725	0.0524691	0.0224898	0.0287371	0.0192841	NS	NA	43170	213212	NA	NA
528	0.330227	0.379089	0.025641	0.0076647	0.0121951	0.0093121	0.0182906	0.00968244	NS	NA	43182	98562	NA	NA
529	3.08422e-05	0.000111638	0.230159	0.301418	0.215333	0.212998	0.241632	0.17055	G	3	432	613646	7	48.18
530	0.00422063	0.00916635	0.0304348	0.0219625	0.0247565	0.0261347	0.0449735	0.0128116	UD	1	43206	200476	NA	NA
531	5.4356e-09	4.1477e-08	0.214286	0.0665508	0.114862	0.0402759	0.0811358	0.0676576	UD	1	43242	5238	NA	NA
532	0.440569	0.48337	0.0588235	0.0445753	0.0441362	0.0401259	0.0428614	0.036149	NS	NA	433	19606	NA	NA
533	0.0973337	0.136946	0.011976	0.0265696	0.037873	0.0258263	0.0315612	0.0181635	NS	NA	43446	126150	NA	NA
534	0.148526	0.197181	0.0316456	0.0209863	0.0329755	0.021938	0.0288055	0.0140437	NS	NA	43452	148528	6	74.76
535	3.07729e-10	2.96189e-09	0.173913	0.110273	0.127213	0.160509	0.136447	0.0811126	UD	1	43494	146277	5	51.31
536	0.176625	0.225984	0.0346535	0.0226811	0.0294035	0.0212062	0.0152674	0.0231169	NS	NA	43494	221078	5	51.31
537	0.00897363	0.0173955	0.0514706	0.0500174	0.0315563	0.0552765	0.0637253	0.0460498	BD	1	43494	260290	5	51.31
538	2.00345e-05	7.60951e-05	0.127273	0.0481677	0.0717081	0.0821608	0.0373631	0.114474	BD	2	43500	140106	5	61.8
539	0.0325353	0.052691	0.038835	0.0252326	0.0132456	0.0266294	0.0354733	0.0096831	NS	NA	43526	114235	7	45.74
540	1.05894e-19	2.56264e-18	0.311927	0.345683	0.369989	0.43577	0.418954	0.280939	UD	3	43526	76851	7	45.74
541	0.401932	0.448418	0.42623	0.423801	0.356895	0.388597	0.44	0.438362	NS	NA	43598	154879	NA	NA
542	8.56148e-05	0.000281069	0.633663	0.4858	0.486797	0.401534	0.528571	0.454238	G	5	43608	261284	NA	NA
543	0.434345	0.479023	0.245763	0.237941	0.231691	0.23645	0.228448	0.212659	NS	NA	43616	250664	7	32.91
544	0.0526166	0.0804445	0.0615385	0.0455732	0.0331434	0.0453631	0.0335918	0.05903	NS	NA	43630	108304	10	81.67
545	4.97246e-19	1.10834e-17	0.0423729	0.0528507	0.0872093	0.0652175	0.217771	0.0399207	BD	5	43648	174750	NA	NA
546	0.206782	0.255603	0.121739	0.0684623	0.0952866	0.08589	0.0850234	0.100619	NS	NA	43662	180626	NA	NA
547	0.00321976	0.00725303	0.0461538	0.0792784	0.0956236	0.113786	0.15455	0.180819	G	1	43662	43045	NA	NA
548	0.154121	0.202076	0.0433604	0.0165626	0.0143806	0.0196341	0.0209686	0.0184901	NS	NA	43686	207422	NA	NA
549	0.00102645	0.0026266	0.056338	0.07045	0.128788	0.112034	0.0414459	0.0976677	UD	2	43726	249471	NA	NA
550	3.25069e-10	3.09364e-09	0.0494792	0.0254615	0.0371698	0.0306275	0.0937838	0.0398845	BD	1	43798	175195	NA	NA
551	0.00564697	0.0117807	0.13253	0.0541744	0.0516691	0.0553472	0.0778673	0.0941279	G	1	43798	72927	NA	NA
552	1.70398e-10	1.69796e-09	0.0996169	0.199888	0.180182	0.218412	0.0854653	0.109067	UD	3	43804	157029	NA	NA
553	0.231635	0.281791	0.0151515	0.0189407	0.00965163	0.020423	0.0283287	0.00985093	NS	NA	43804	70415	NA	NA
554	8.49398e-06	3.56158e-05	0.056338	0.150555	0.148268	0.0899041	0.135177	0.0509314	UD	1	43844	15318	9	22.24
555	0.0199425	0.0344538	0.0305344	0.0420452	0.0496343	0.054785	0.0570547	0.0840041	G	2	43868	216807	7	67.76
556	5.36618e-08	3.52338e-07	0.045977	0.0909277	0.0889191	0.156732	0.0784756	0.078058	UD	3	43894	83474	NA	NA
557	6.46541e-08	4.18031e-07	0.236052	0.379932	0.377115	0.267986	0.214904	0.373583	UD	4	43920	275255	NA	NA
558	0.0139885	0.0253169	0.0491071	0.0452185	0.0346918	0.0494753	0.0680821	0.0577014	G	1	43986	188429	NA	NA
559	0.000159918	0.000494346	0.0847458	0.154317	0.165009	0.14456	0.0781109	0.114473	BD	2	43988	203284	NA	NA
560	0.194967	0.24574	0.0511364	0.0265623	0.041371	0.0247554	0.0313735	0.039627	NS	NA	43988	353461	NA	NA
561	0.00782647	0.0154999	0.114754	0.116826	0.0865385	0.119801	0.104091	0.167903	G	2	44	313105	NA	NA
562	3.04424e-31	1.71898e-29	0.337349	0.163744	0.121984	0.135831	0.284025	0.212023	BD	5	440	15442	NA	NA
563	0.0140612	0.0253941	0.0973451	0.0326448	0.0561661	0.0749853	0.0743935	0.0811349	G	1	44008	218229	NA	NA
564	2.2921e-07	1.30296e-06	0.113537	0.0950264	0.0839385	0.115349	0.111392	0.0884653	BD	1	441	42035	NA	NA
565	7.73083e-33	6.54801e-31	0.206897	0.28777	0.251494	0.364721	0.474502	0.256778	BD	5	443	491436	9	12.24
566	0.000117451	0.000378256	0.047619	0.0237687	0.0338182	0.0446111	0.0546195	0.0683012	G	1	445	37398	NA	NA
567	3.45019e-10	3.24701e-09	0.280899	0.164632	0.0672414	0.0882576	0.203578	0.114893	BD	5	448	104341	NA	NA
568	0.150665	0.199084	0.0247934	0.00433705	0.00606061	0.0116141	0.0201358	0.00795587	NS	NA	448	750818	NA	NA
569	0.0361417	0.0580874	0.0391304	0.0215263	0.0339105	0.0455995	0.0451025	0.0595783	NS	NA	453	112064	NA	NA
570	3.73703e-21	9.89145e-20	0.0736842	0.100628	0.0770597	0.103517	0.0877125	0.0182238	UD	3	453	294603	NA	NA
571	0.0748692	0.108772	0.0141509	0.0215897	0.0328178	0.042735	0.013921	0.0323891	NS	NA	456	95438	NA	NA
572	1.24685e-05	4.98151e-05	0.0288462	0.0303428	0.0221832	0.0399854	0.0313222	0.0169335	G	1	458	75125	NA	NA
573	4.57352e-28	1.84465e-26	0.598639	0.359171	0.357692	0.411831	0.399074	0.288377	UD	1	461	200221	NA	NA
574	0.148096	0.196918	0.0113154	0.0286159	0.0173882	0.0269058	0.0128461	0.0143419	NS	NA	461	394715	NA	NA
575	6.0097e-16	1.08303e-14	0.316832	0.209952	0.219156	0.122672	0.18905	0.255532	BD	2	461	545440	NA	NA
576	5.20782e-12	6.30147e-11	0.142857	0.141715	0.140289	0.147498	0.162782	0.233731	UD	2	461	597138	NA	NA
577	0.793907	0.811145	0.384	0.35034	0.334741	0.326879	0.372525	0.37195	NS	NA	471	312273	1	37.28
578	0.233822	0.282521	0.0266667	0.0149906	0.00373134	0.0200037	0.0130725	0.0223851	NS	NA	471	466879	1	37.28
579	0.233822	0.282521	0.0266667	0.0149906	0.00373134	0.0200037	0.0130725	0.0223851	NS	NA	471	466903	1	37.28
580	0.00285805	0.00652499	0.0698925	0.0414206	0.015625	0.0553565	0.0899292	0.0372811	UD	1	472	104545	4	49.8
581	0.00466757	0.00995826	0.0324324	0.028754	0.042328	0.0162065	0.0559252	0.0487477	UD	1	474	52852	NA	NA
582	0.36669	0.413123	0.0365854	0.0698108	0.0558424	0.062485	0.0353338	0.0344307	NS	NA	479	146598	NA	NA
583	2.20357e-05	8.33225e-05	0.125	0.14088	0.0630013	0.150088	0.125895	0.0710466	UD	3	479	300099	NA	NA
584	4.20245e-11	4.44935e-10	0.204918	0.308912	0.223937	0.196594	0.198457	0.149828	UD	3	481	504995	7	44.72
585	0.0175407	0.0306963	0.0103627	0.0130604	0.0141326	0.0190684	0.00937636	0.00772017	G	1	481	511626	7	44.72
586	2.25446e-09	1.80722e-08	0.464286	0.421716	0.46771	0.47928	0.302044	0.465236	BD	4	481	773469	7	44.72
587	0.000200339	0.000601728	0.195312	0.123629	0.125908	0.130001	0.141608	0.14414	UD	1	481	802557	7	44.72
588	0.0956741	0.135285	0.0409836	0.0164598	0.00916667	0.00728951	0.0148865	0.0108729	NS	NA	485	472957	NA	NA
589	4.39251e-07	2.31084e-06	0.025641	0.0295061	0.0562226	0.00978439	0.0583521	0.00958411	BD	1	489	317390	NA	NA
590	5.22889e-08	3.46005e-07	0.141791	0.180592	0.177907	0.135305	0.155317	0.0783004	UD	1	489	43138	NA	NA
591	0.031832	0.0518495	0.0441176	0.0572419	0.0504955	0.0415706	0.0312506	0.0713979	NS	NA	491	36094	NA	NA
592	4.43975e-13	5.5301e-12	0.183824	0.107651	0.048913	0.152079	0.266157	0.0930225	BD	5	492	392567	10	40.53
593	0.632177	0.664335	0.130435	0.145271	0.13652	0.153617	0.144644	0.128008	NS	NA	496	43205	5	40.5
594	0.0431804	0.0676041	0.0280899	0.0156049	0	0.0361373	0.0340019	0.0237491	NS	NA	498	42035	NA	NA
595	0.0647725	0.0960251	0.0191083	0.007837	0.00465116	0.0157639	0.0183031	0.00436966	NS	NA	50	181083	4	32.61
596	0.859589	0.870899	0.0310559	0.0281575	0.0155075	0.0374077	0.0237538	0.0182443	NS	NA	501	280274	NA	NA
597	9.42783e-07	4.61582e-06	0.0183824	0.0547285	0.130574	0.0640865	0.0515824	0.091828	BD	2	501	524179	NA	NA
598	0.00469315	0.00998768	0.057377	0.0511799	0.0607524	0.0361263	0.0626782	0.026835	G	1	501	730006	NA	NA
599	0.291939	0.340595	0.0344828	0.0765976	0.0696034	0.0611299	0.101923	0.0715473	NS	NA	502	797752	6	14.93
600	5.66832e-20	1.41208e-18	0.346405	0.413666	0.545113	0.591883	0.293056	0.538173	BD	4	504	139882	5	76.31
601	0.205711	0.254732	0.0344828	0.0237417	0.0160406	0.0109294	0.0201796	0.0173293	NS	NA	506	202384	NA	NA
602	0.000308843	0.000886745	0.0105263	0.0160677	0.0208718	0.0258328	0.0324464	0.0126549	BD	1	507	249138	NA	NA
603	0.207035	0.255603	0.0916031	0.0658824	0.0550061	0.0675431	0.0562673	0.0553679	NS	NA	507	361741	NA	NA
604	0.0511145	0.0787164	0.0131004	0.0215244	0.0278283	0.0368905	0.0366321	0.0113244	NS	NA	513	592587	NA	NA
605	1.45257e-05	5.68593e-05	0.0232558	0.0336898	0.0468314	0.0530605	0.0733758	0.0176662	UD	1	514	3546	NA	NA
606	0.19984	0.249653	0.0102041	0.0200934	0.0282128	0.0172361	0.0132752	0.0212822	NS	NA	520	215489	NA	NA
607	0.0913986	0.130109	0.0377358	0.0358528	0.0521519	0.0584632	0.0231484	0.041477	NS	NA	522	446895	10	88.58
608	0.0220983	0.0373598	0.084507	0.0709989	0.0385277	0.0848081	0.0859168	0.070733	UD	1	524	124650	NA	NA
609	0.055866	0.0841966	0.0384615	0.0183654	0.0137464	0.0159116	0.0200553	0.0221041	NS	NA	527	71795	NA	NA
610	0.446837	0.487093	0.0723404	0.0513648	0.0539972	0.0616173	0.0666632	0.0519676	NS	NA	53	293952	9	36.58
611	0.000119609	0.000380859	0.0731707	0.0890597	0.0467453	0.0721752	0.114079	0.039121	UD	1	53	48174	9	36.58
612	1.91129e-33	1.79874e-31	0.0236967	0.0334166	0.0317684	0.0343372	0.0761085	0.128372	UD	2	531	64950	NA	NA
613	0.0107838	0.0201187	0.121622	0.101452	0.139305	0.123484	0.148719	0.128167	G	1	535	201417	8	68.64
614	2.26211e-32	1.47385e-30	0.417722	0.323611	0.295176	0.361153	0.221369	0.144068	UD	3	535	404173	8	68.64
615	0.0194012	0.033743	0.0416667	0.0596992	0.0341718	0.087706	0.0504386	0.0807308	G	2	541	395445	NA	NA
616	7.45809e-06	3.17437e-05	0.0358974	0.02	0	0.0217076	0.0434098	0.0124515	UD	1	541	467596	NA	NA
617	0.255768	0.304691	0.0410959	0.0427899	0.00769231	0.0319927	0.0180652	0.032665	NS	NA	541	633682	NA	NA
618	0.170227	0.219455	0.035533	0.0421443	0.0212865	0.022873	0.02973	0.022236	NS	NA	542	143994	NA	NA
619	3.2544e-46	9.18826e-44	0.432432	0.546016	0.48546	0.559186	0.585808	0.291053	UD	3	547	277997	7	14.6
620	0.00125304	0.00315871	0.0120482	0.0131801	0.00649351	0.00565362	0.0104893	0.00950452	G	1	550	315937	NA	NA
621	0.00149161	0.00363922	0.246753	0.181593	0.184368	0.178388	0.247611	0.278579	UD	1	550	325878	NA	NA
622	0.00441411	0.00951335	0.0280899	0.0293216	0.016469	0.0253507	0.0453046	0.0128618	UD	1	552	50211	NA	NA
623	3.08851e-06	1.38411e-05	0.421053	0.474205	0.455701	0.420647	0.454299	0.395333	UD	1	557	331678	NA	NA
624	0.0233678	0.0391931	0.0421687	0.0401453	0.0193287	0.0313992	0.0526961	0.0254742	G	1	557	525427	NA	NA
625	0.000308098	0.000886745	0.160622	0.114394	0.0760935	0.0712048	0.102415	0.102936	G	1	564	202712	3	16.21
626	0.897393	0.903795	0.0560345	0.0519996	0.0557653	0.0669224	0.0583772	0.0532212	NS	NA	569	121803	NA	NA
627	5.35602e-06	2.33843e-05	0.046332	0.0432165	0.0399175	0.0506709	0.0366476	0.019645	G	1	575	142263	NA	NA
628	0.41672	0.462598	0.0392157	0.00763446	0.0158382	0.00984611	0.0130402	0.0161718	NS	NA	580	587315	1	65.77
629	0.00447381	0.00961755	0.0288462	0.0279258	0.0274115	0.0496553	0.0493442	0.0422533	G	1	583	348537	NA	NA
630	6.57791e-30	3.27735e-28	0.371585	0.468776	0.465747	0.594215	0.484822	0.280481	UD	3	586	150765	NA	NA
631	0.0755516	0.10951	0.0416667	0.0155561	0.00561798	0.0261104	0.0344341	0.0176411	NS	NA	587	96988	NA	NA
632	0.0152067	0.027116	0.011236	0.0517755	0.0198125	0.0337031	0.0428737	0.0534239	G	1	591	621505	NA	NA
633	0.573009	0.608194	0.0147059	0.0110276	0.010101	0.00849655	0.00215517	0.0165828	NS	NA	595	119078	NA	NA
634	2.07988e-07	1.19031e-06	0.244681	0.210217	0.233622	0.263538	0.254778	0.173163	UD	1	599	624253	NA	NA
635	0.101821	0.142314	0.110266	0.0546021	0.0672921	0.072156	0.120172	0.0772503	NS	NA	6	164891	NA	NA
636	0.693733	0.720972	0.0408163	0.0306032	0.0360606	0.0395213	0.029272	0.0237825	NS	NA	6	582219	NA	NA
637	4.5277e-24	1.36963e-22	0.345238	0.223803	0.166462	0.251798	0.139813	0.426989	BD	4	6	582283	NA	NA
638	2.65115e-25	8.63662e-24	0.0438247	0.113506	0.10866	0.151045	0.123523	0.0436744	UD	3	602	25902	NA	NA
639	1.1449e-05	4.61775e-05	0.0429448	0.0664649	0.0475004	0.0780654	0.026614	0.0223258	UD	2	605	47013	NA	NA
640	0.246504	0.295316	0.0669456	0.0346421	0.0484738	0.0501899	0.0296951	0.0324812	NS	NA	606	15444	NA	NA
641	2.54767e-05	9.42303e-05	0.0322581	0.0307882	0.0333333	0.116032	0.0269566	0.0746834	BD	2	606	287327	NA	NA
642	0.072259	0.105705	0.0193237	0.00604646	0.00932845	0.00861678	0.0104274	0.0178151	NS	NA	61	40393	NA	NA
643	0.435807	0.480011	0.0133333	0.00712264	0.0105536	0.0269996	0.0047619	0.0118933	NS	NA	61	9429	NA	NA
644	0.772401	0.792038	0.0508475	0.0654809	0.0696667	0.0521478	0.0397988	0.0512947	NS	NA	610	148530	NA	NA
645	0.00167215	0.00400088	0.206897	0.162571	0.137986	0.137628	0.190678	0.180674	G	1	610	356646	NA	NA
646	0.261938	0.310787	0.0178571	0.00685415	0.00617284	0.011594	0.00229885	0.0185562	NS	NA	612	218291	6	98.09
647	1.04408e-14	1.63765e-13	0.185053	0.18445	0.157857	0.131433	0.249465	0.133268	BD	5	614	226537	NA	NA
648	0.0805093	0.115522	0.0364583	0.0406779	0.0412546	0.0370243	0.043674	0.0214563	NS	NA	616	174100	5	72.19
649	0.0170431	0.0300114	0.128655	0.0718275	0.0733093	0.081743	0.106951	0.0769798	G	1	621	439295	8	33.83
650	0.15398	0.202076	0.0519481	0.0134691	0.0186242	0.0207643	0.0107646	0.0112549	NS	NA	622	162683	NA	NA
651	2.45624e-13	3.35554e-12	0.492188	0.438015	0.434606	0.373305	0.315431	0.296772	UD	2	625	334824	NA	NA
652	0.171032	0.220159	0.113924	0.127001	0.121555	0.151154	0.0848605	0.145722	NS	NA	625	377685	NA	NA
653	0.268488	0.318055	0.127907	0.144735	0.151274	0.116656	0.145574	0.102837	NS	NA	625	382558	NA	NA
654	3.10364e-13	4.04428e-12	0.285714	0.246215	0.145261	0.142356	0.329895	0.155271	BD	5	63	440842	5	61.34
655	0.0806062	0.115522	0.0218579	0.0363302	0.0206273	0.0104171	0.0206757	0.0138581	NS	NA	63	481940	5	61.34
656	0.133839	0.180225	0.0177515	0.00896698	0.0214919	0.0222619	0.0195728	0.0260973	NS	NA	631	24379	7	73.83
657	0.00645167	0.0130157	0.0632911	0.0904678	0.0793706	0.0981757	0.0654106	0.141472	G	2	632	10036	NA	NA
658	0.0571728	0.0858605	0.165138	0.121552	0.168488	0.175822	0.12306	0.172386	NS	NA	632	62016	NA	NA
659	0.643087	0.673294	0.283951	0.287763	0.265005	0.308679	0.250216	0.257688	NS	NA	658	398868	NA	NA
660	0.744723	0.769244	0.0100503	0.00540211	0.00241546	0.00581737	0.0114943	0.0121988	NS	NA	66	19419	NA	NA
661	0.0512312	0.0787529	0.0990099	0.061019	0.0505463	0.0574664	0.0532018	0.056269	NS	NA	672	49091	NA	NA
662	0.00100164	0.00257087	0.166667	0.124323	0.120362	0.14864	0.0559441	0.185593	UD	2	675	314824	10	75.09
663	0.775331	0.794081	0.0151515	0.0200815	0.00980392	0.0131194	0.0217391	0.0178799	NS	NA	678	503942	NA	NA
664	0.477964	0.515714	0.15122	0.130508	0.116622	0.111735	0.13642	0.120192	NS	NA	678	792792	NA	NA
665	0.00185933	0.00439904	0.09375	0.0553135	0.0769231	0.0462733	0.0647859	0.0741386	BD	1	695	348099	4	83.77
666	0.000873087	0.00226842	0.19186	0.211216	0.30793	0.164558	0.157852	0.23601	BD	2	70	317131	4	7.13
667	5.44385e-07	2.81155e-06	0.0305344	0.0426863	0.055466	0.0857683	0.0211029	0.0277096	UD	2	70	386347	4	7.13
668	0.0013863	0.00341337	0.0392157	0.0359069	0.0176367	0.0204214	0.0599343	0.0268496	UD	1	709	444445	NA	NA
669	0.0527515	0.0805055	0.0192308	0.0828111	0.129764	0.0786253	0.081155	0.0638829	NS	NA	709	511932	NA	NA
670	1.31617e-05	5.20932e-05	0.0666667	0.0279968	0.0614049	0.0801799	0.0521486	0.122107	G	2	709	97603	NA	NA
671	3.59404e-06	1.60218e-05	0.0341151	0.0109816	0.0037999	0.00969808	0.0282564	0.00960564	BD	1	71	186473	8	22.7
672	0.00307886	0.0069914	0.0486618	0.0880216	0.0451959	0.0662187	0.072334	0.0792954	UD	1	71	198301	8	22.7
673	0.202404	0.252112	0.0111111	0.0243038	0.00980392	0.006	0.00769231	0.00988475	NS	NA	713	252923	1	14.86
674	0.148851	0.197304	0.0897436	0.0662004	0.0800579	0.0782627	0.0742721	0.0454163	NS	NA	713	37424	1	14.86
675	0.0116997	0.0216842	0.0892857	0.0673563	0.0623649	0.0598323	0.0462009	0.0923608	UD	2	72	281863	NA	NA
676	9.76209e-08	5.82288e-07	0.0122699	0.00784407	0.0168462	0.00702845	0.00132802	0.0348303	G	2	721	24896	3	49.87
677	3.58253e-09	2.80963e-08	0.39604	0.427469	0.47283	0.455743	0.53601	0.405889	BD	5	721	358126	3	49.87
678	0.251755	0.301182	0.0376344	0.0452715	0.0316044	0.0419806	0.0516147	0.0575781	NS	NA	726	16777	NA	NA
679	3.52217e-07	1.91236e-06	0.0300752	0.156801	0.0947677	0.110647	0.12627	0.18781	UD	2	728	265997	NA	NA
680	2.60215e-06	1.18496e-05	0.262626	0.194514	0.103707	0.137025	0.12922	0.110004	G	1	733	270101	1	0.38
681	4.51087e-07	2.35846e-06	0.0909091	0.0749736	0.0505816	0.0895496	0.201553	0.0679889	BD	5	733	483923	1	0.38
682	0.0392974	0.0623313	0.0147059	0.0156587	0.00584795	0.0258395	0.0163274	0.0350687	NS	NA	733	752055	1	0.38
683	0.0392974	0.0623313	0.0147059	0.0156587	0.00584795	0.0268861	0.0163274	0.0350687	NS	NA	733	752063	1	0.38
684	0.00593588	0.0122031	0.0275591	0.0351317	0.0528126	0.0380883	0.0249695	0.0542666	UD	2	743	209495	NA	NA
685	2.76424e-15	4.68263e-14	0.0594059	0.0200639	0.0387514	0.0163711	0.0365059	0.0819725	UD	2	750	357047	5	67.03
686	6.27127e-29	2.65588e-27	0.0494418	0.0137402	0.0586876	0.0621745	0.0781708	0.0263999	BD	1	751	319271	NA	NA
687	2.23636e-05	8.41411e-05	0.0301624	0.0125249	0.010313	0.0169293	0.0215344	0.0311435	UD	1	756	201948	NA	NA
688	0.44345	0.485274	0.0486111	0.0215205	0.0529557	0.0367037	0.0234201	0.0249274	NS	NA	756	238826	NA	NA
689	0.00917382	0.0177402	0.0969388	0.0977606	0.0584105	0.0840396	0.196321	0.110344	G	5	760	583963	4	7.79
690	1.15374e-13	1.68486e-12	0.0142857	0.0472461	0.0569944	0.0260979	0.0271524	0.0756805	BD	2	760	647482	4	7.79
691	3.5813e-17	7.05432e-16	0.297619	0.30037	0.180569	0.217373	0.343231	0.237342	BD	5	760	80988	4	7.79
692	0.168613	0.218372	0.0625	0.132917	0.100806	0.114836	0.120039	0.0907943	NS	NA	764	25951	NA	NA
693	3.09301e-07	1.70115e-06	0.0444444	0.0137261	0.018993	0.00862795	0.0640398	0.0109294	BD	1	77	631695	NA	NA
694	0.253677	0.303053	0.376147	0.338029	0.295179	0.321832	0.382311	0.325541	NS	NA	773	202888	NA	NA
695	0.010336	0.0194116	0.134228	0.1867	0.17732	0.121316	0.2148	0.169204	UD	1	775	120424	NA	NA
696	0.000678998	0.00181997	0.0704225	0.0803464	0.081894	0.0769545	0.120785	0.139004	UD	1	782	108750	NA	NA
697	0.614738	0.647615	0.0361446	0.028141	0.0277335	0.0316707	0.0470185	0.0358012	NS	NA	784	101772	NA	NA
698	2.61104e-16	4.80772e-15	0.237668	0.162588	0.176738	0.203037	0.139406	0.287654	BD	2	79	236742	6	77.27
699	0.239193	0.287779	0.0223464	0.0170485	0.0133633	0.0127617	0.0203874	0.0242598	NS	NA	790	120843	7	72.51
700	0.124407	0.169409	0.0114068	0.0246005	0.0282713	0.0206825	0.00737719	0.0208295	NS	NA	790	38863	7	72.51
701	0.00162154	0.00390183	0.0747664	0.0429418	0.0446594	0.0140998	0.021789	0.0349618	G	2	795	8758	NA	NA
702	0.0061058	0.0124918	0.0743802	0.0555543	0.0209742	0.05278	0.101708	0.0411595	UD	1	801	298607	NA	NA
703	0.243639	0.292298	0.038961	0.0135521	0.0375481	0.0286146	0.0321023	0.0139906	NS	NA	801	618768	NA	NA
704	0.0157024	0.0279411	0.0111111	0.00811462	0.0222186	0.0270386	0.0109098	0.0140378	G	2	801	72978	NA	NA
705	9.93605e-14	1.47646e-12	0.0465116	0.0224097	0.0873513	0.0157621	0.101677	0.102968	BD	1	801	98216	NA	NA
706	0.0407227	0.0642312	0.0444444	0.0366058	0.00925926	0.045568	0.0793053	0.0488652	NS	NA	804	383828	NA	NA
707	0.000715425	0.00190116	0.0547945	0.0209248	0.0180465	0.0434183	0.0395689	0.0444507	UD	1	808	567172	NA	NA
708	0.44488	0.485585	0.0736842	0.0635119	0.0419511	0.0586536	0.0519331	0.0489459	NS	NA	808	9609	NA	NA
709	0.000116396	0.000376287	0.0844156	0.0463872	0.0176471	0.0496131	0.110558	0.0473096	BD	1	829	433226	NA	NA
710	4.83531e-10	4.40377e-09	0.333333	0.415141	0.471578	0.560066	0.524305	0.40626	UD	3	829	59668	NA	NA
711	0.778535	0.796399	0.0128205	0.0187743	0.0231111	0.0185662	0.0225838	0.0257668	NS	NA	835	298308	4	66.47
712	0.0479291	0.0743516	0.137931	0.118724	0.0967203	0.144351	0.0664694	0.114406	NS	NA	847	82187	NA	NA
713	0.00270828	0.00619977	0.223684	0.111569	0.128957	0.131051	0.104137	0.160258	UD	2	850	172286	2	53.47
714	0.575019	0.609564	0.0636364	0.0496582	0.0644732	0.0591608	0.050475	0.0539816	NS	NA	850	190686	2	53.47
715	0.0199727	0.0344538	0.194805	0.118202	0.0920028	0.123248	0.142824	0.118306	G	1	850	74441	2	53.47
716	4.46456e-08	3.00118e-07	0.116279	0.0624073	0.0809524	0.179421	0.0903813	0.142744	UD	2	853	111361	NA	NA
717	1.98969e-08	1.41619e-07	0.0227273	0.0370931	0.0246774	0.0352042	0.0302665	0.0137284	UD	1	853	444334	NA	NA
718	2.26197e-11	2.55451e-10	0.123288	0.0227089	0.0263514	0.0410795	0.039937	0.112672	BD	2	854	612350	6	84.11
719	0.00125296	0.00315871	0.0645161	0.0861852	0.117063	0.0986851	0.0856481	0.04	G	1	86	1103812	NA	NA
720	1.72966e-05	6.6592e-05	0.214286	0.164802	0.268182	0.222399	0.242564	0.286631	UD	2	86	1280478	NA	NA
721	0.595019	0.629424	0.0493827	0.0459952	0.055	0.0388099	0.0503053	0.0558152	NS	NA	867	342124	NA	NA
722	0.439394	0.483333	0.0289256	0.0200624	0.0259248	0.0216143	0.0116484	0.0173484	NS	NA	867	935924	NA	NA
723	0.000188497	0.000572248	0.214876	0.163402	0.148909	0.143012	0.175853	0.19714	G	1	868	52460	7	5.34
724	0.153799	0.202076	0.209677	0.274532	0.283671	0.280093	0.274165	0.318367	NS	NA	880	47782	NA	NA
725	9.17019e-06	3.76404e-05	0.336364	0.313785	0.247004	0.298841	0.413012	0.3197	BD	5	885	267216	4	26.87
726	0.000203033	0.000607665	0.0479705	0.0113716	0.0257489	0.00981457	0.0349007	0.0243678	UD	1	885	275687	4	26.87
727	0.00135242	0.00335924	0.0330579	0.0667294	0.054705	0.0878169	0.0492276	0.0922777	UD	2	885	276294	4	26.87
728	1.33911e-30	7.08893e-29	0.362768	0.147034	0.336738	0.237723	0.558869	0.219873	BD	5	888	100294	NA	NA
729	0.00960044	0.0183972	0.471154	0.481848	0.48729	0.469373	0.422964	0.448567	G	2	888	229909	NA	NA
730	0.863667	0.873986	0.0222222	0.021176	0.0197368	0.0138459	0.0146682	0.0190078	NS	NA	890	297478	10	14.2
731	0.00644643	0.0130157	0.0398671	0.0315113	0.0321759	0.0483873	0.0264825	0.0423753	G	2	891	181141	NA	NA
732	6.37084e-05	0.000215844	0.0971429	0.0812956	0.0847981	0.107936	0.0618909	0.0825516	UD	2	90	149521	NA	NA
733	0.00566892	0.0117975	0.0288809	0.0131808	0.00493827	0.0122011	0.0108327	0.0211746	G	1	90	37360	NA	NA
734	0.333069	0.381229	0.0322581	0.0540705	0.0475767	0.0492899	0.0575076	0.0656772	NS	NA	90	419577	NA	NA
735	0.273428	0.322553	0.028169	0.0285303	0.0456097	0.0341184	0.0428363	0.03344	NS	NA	914	417775	NA	NA
736	0.147372	0.196264	0.111607	0.131124	0.106256	0.0899433	0.110187	0.0996769	NS	NA	923	186092	NA	NA
737	0.131356	0.17773	0.0425532	0.0401031	0.0228087	0.0275827	0.0501121	0.0247645	NS	NA	924	83054	NA	NA
738	0.000360173	0.00102716	0.0149254	0.0137457	0.00847458	0.0157009	0.0538186	0.00675907	UD	1	925	139471	NA	NA
739	0.00431071	0.00931422	0.0107527	0.00521037	0.021146	0.0355062	0.0282778	0.0178897	G	1	948	31552	NA	NA
740	0.566176	0.601696	0.0125	0.0285006	0.0218858	0.0143518	0.018874	0.0224755	NS	NA	963	364525	NA	NA
741	0.207319	0.255603	0.0842105	0.0442223	0.0637566	0.0488753	0.0443079	0.0526982	NS	NA	963	582	NA	NA
742	0.0373566	0.059677	0.0246914	0.00491973	0.00984712	0.00799928	0.0239012	0.0245651	NS	NA	971	8046	NA	NA
743	0.0191774	0.0334223	0.320261	0.219691	0.167141	0.284936	0.261801	0.235956	UD	1	973	552846	NA	NA
744	0.00110321	0.00281451	0.15	0.120794	0.113095	0.135933	0.182022	0.165399	UD	1	98	118301	NA	NA
745	7.69966e-08	4.76393e-07	0.428571	0.543254	0.502249	0.415731	0.606629	0.455243	BD	5	98	172515	NA	NA
746	0.149474	0.197819	0.447674	0.375984	0.381656	0.347419	0.360893	0.342575	NS	NA	980	106871	3	90.25
747	0.330587	0.379089	0.0290698	0.0215451	0.0208367	0.0344727	0.0238518	0.0385413	NS	NA	980	205996	3	90.25
748	0.142851	0.191146	0.0168067	0.013794	0.0170292	0.0132809	0.0128205	0.00456841	NS	NA	99	167897	NA	NA
749	0.00344286	0.00767396	0.0127119	0.0250143	0.0172194	0.0285801	0.0133271	0.0169484	UD	2	99	523394	NA	NA
750	6.75374e-54	2.86021e-51	0.107595	0.165319	0.212319	0.165514	0.32612	0.41679	UD	2	99	98991	NA	NA
751	1.83475e-09	1.50877e-08	0.0120968	0.0143043	0.0263253	0.0944117	0.0464583	0.0196433	G	3	998	78344	NA	NA
